# Supplementary material for: Recent changes in the frequency of plant species and vegetation types in Scania, S Sweden, compared to changes during the twentieth century
Source: Springer Nature journal article supplement (doi:10.1007/s10531-019-01906-5), 2019-11-26
Supplement: MOESM1 [file 17436674]

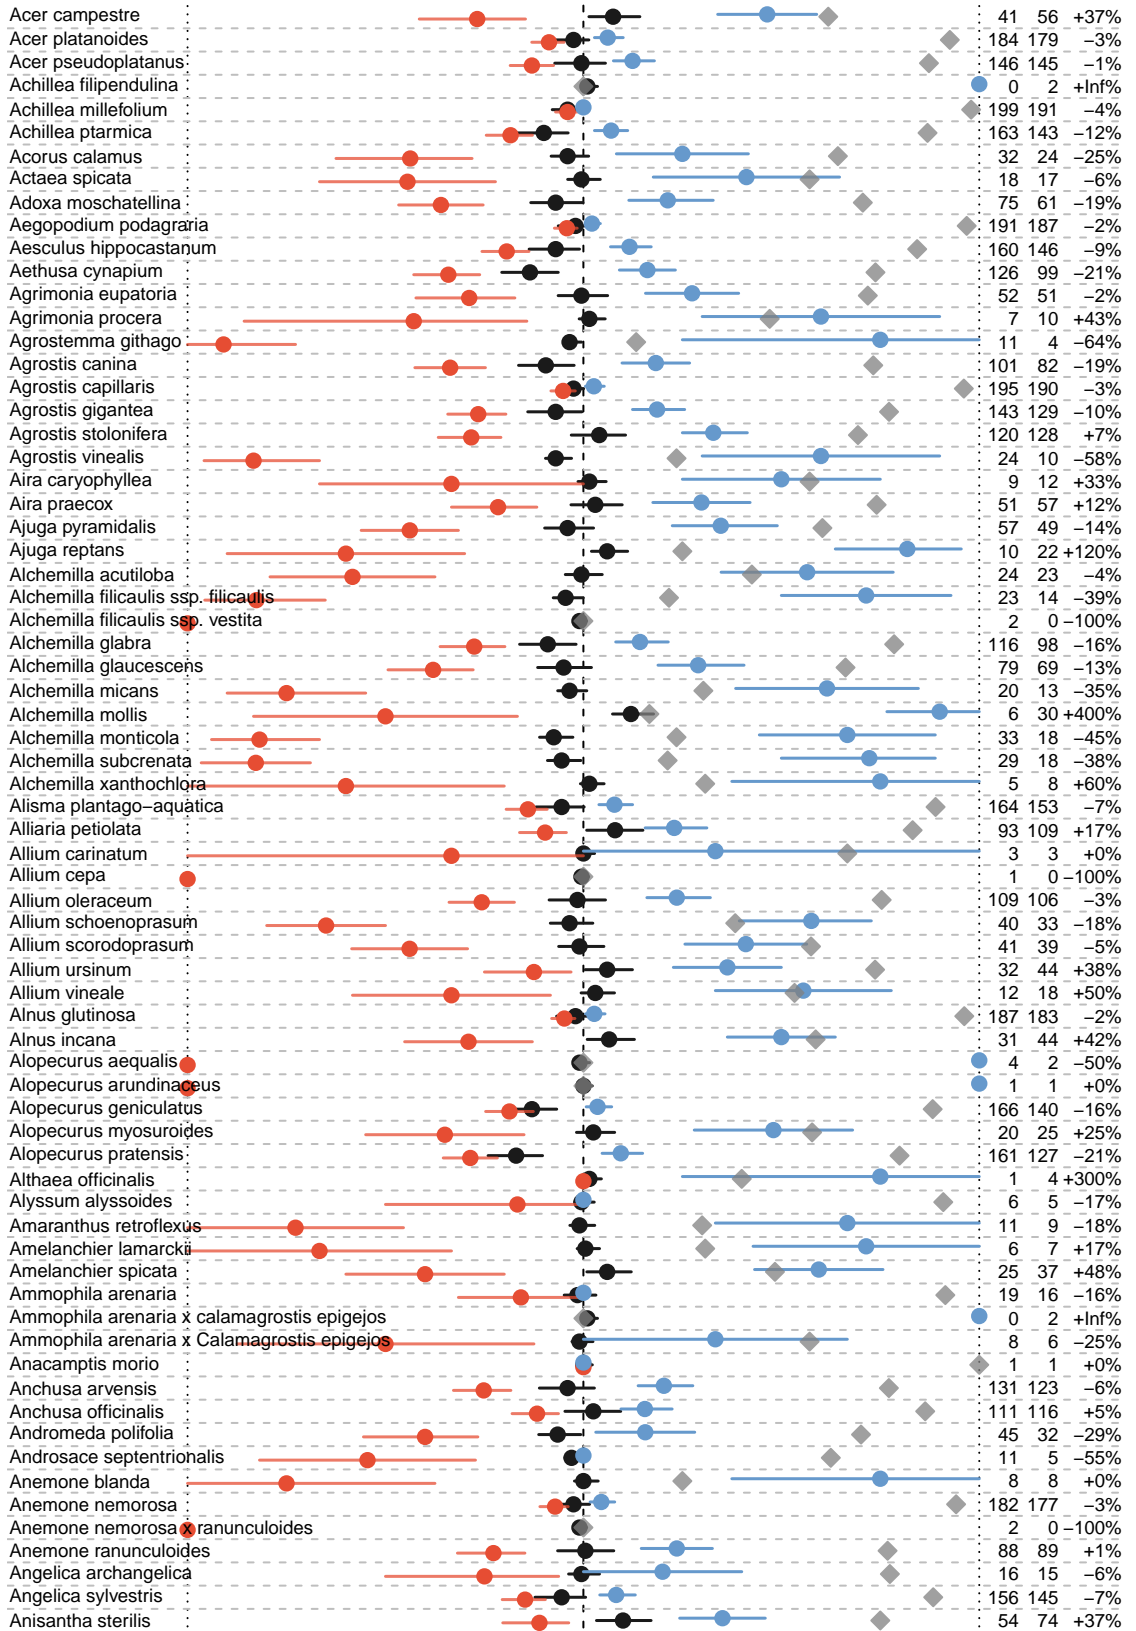

Rates

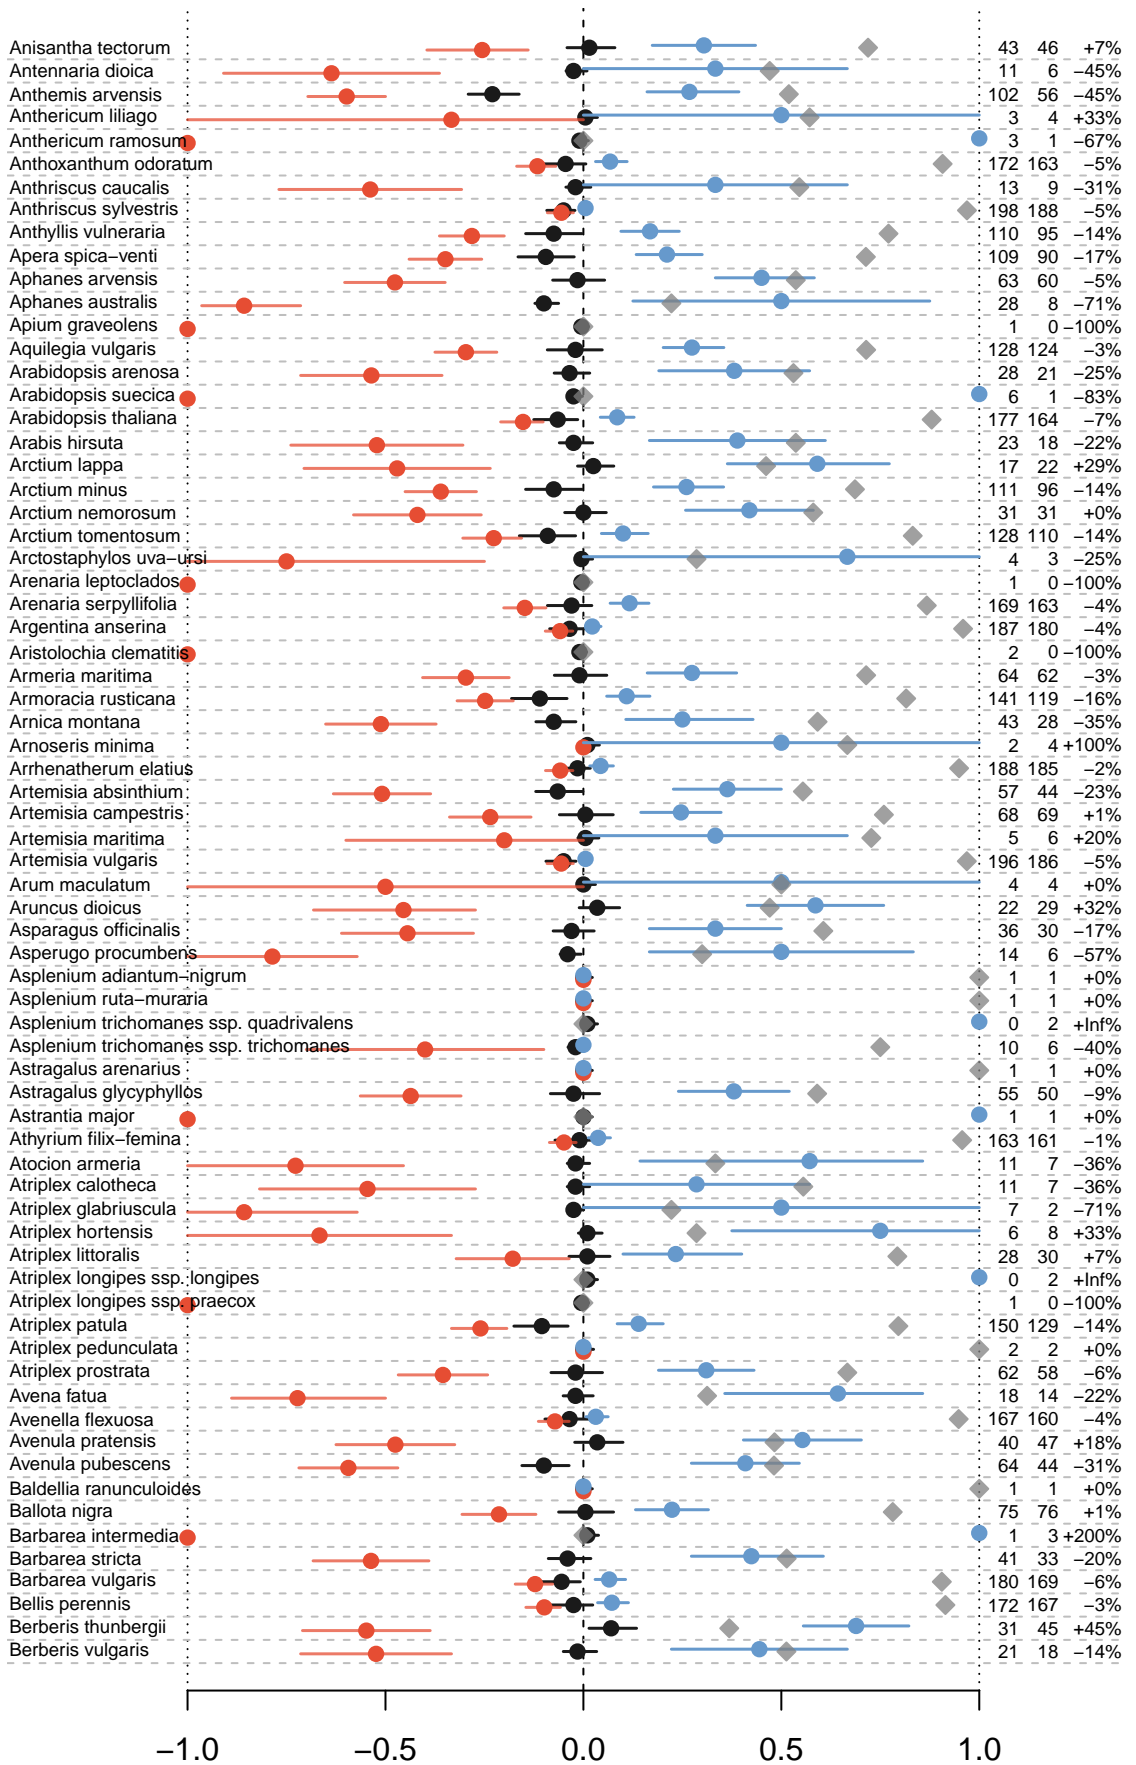

Rates

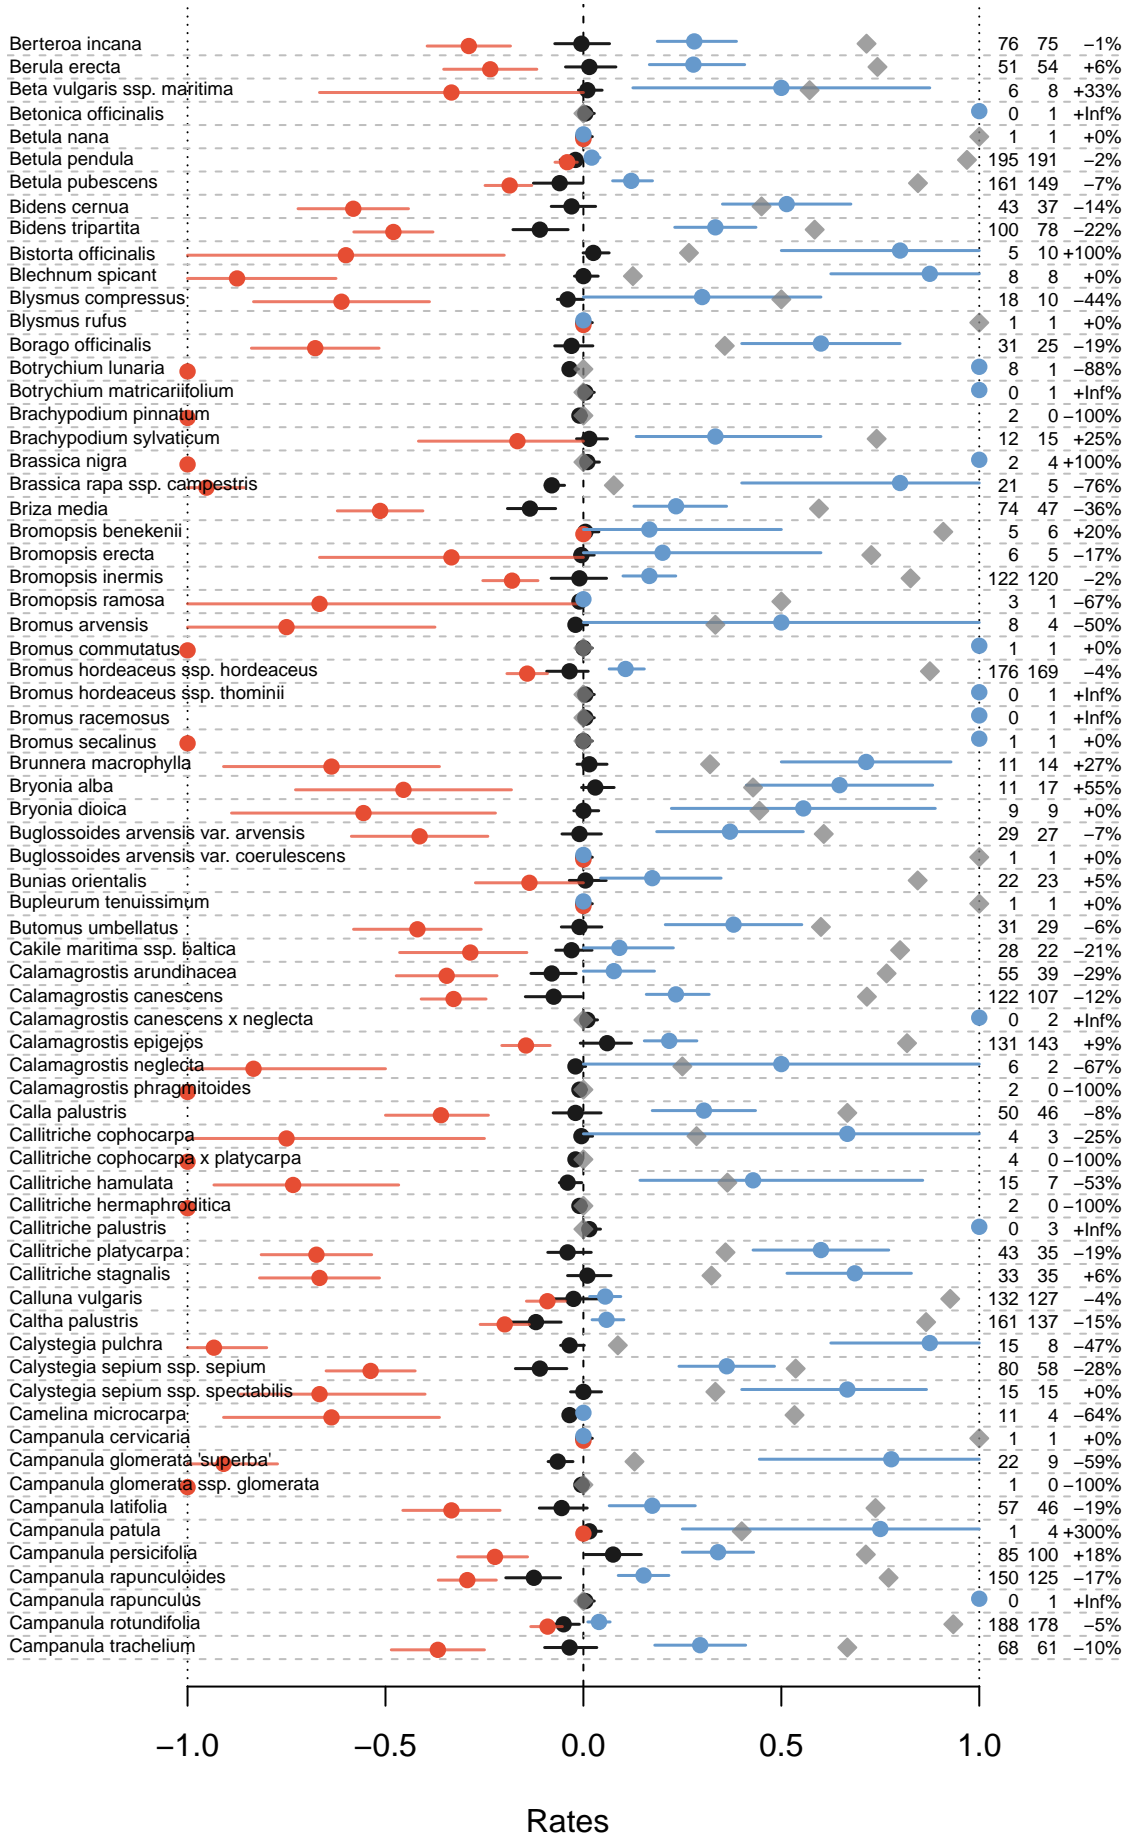

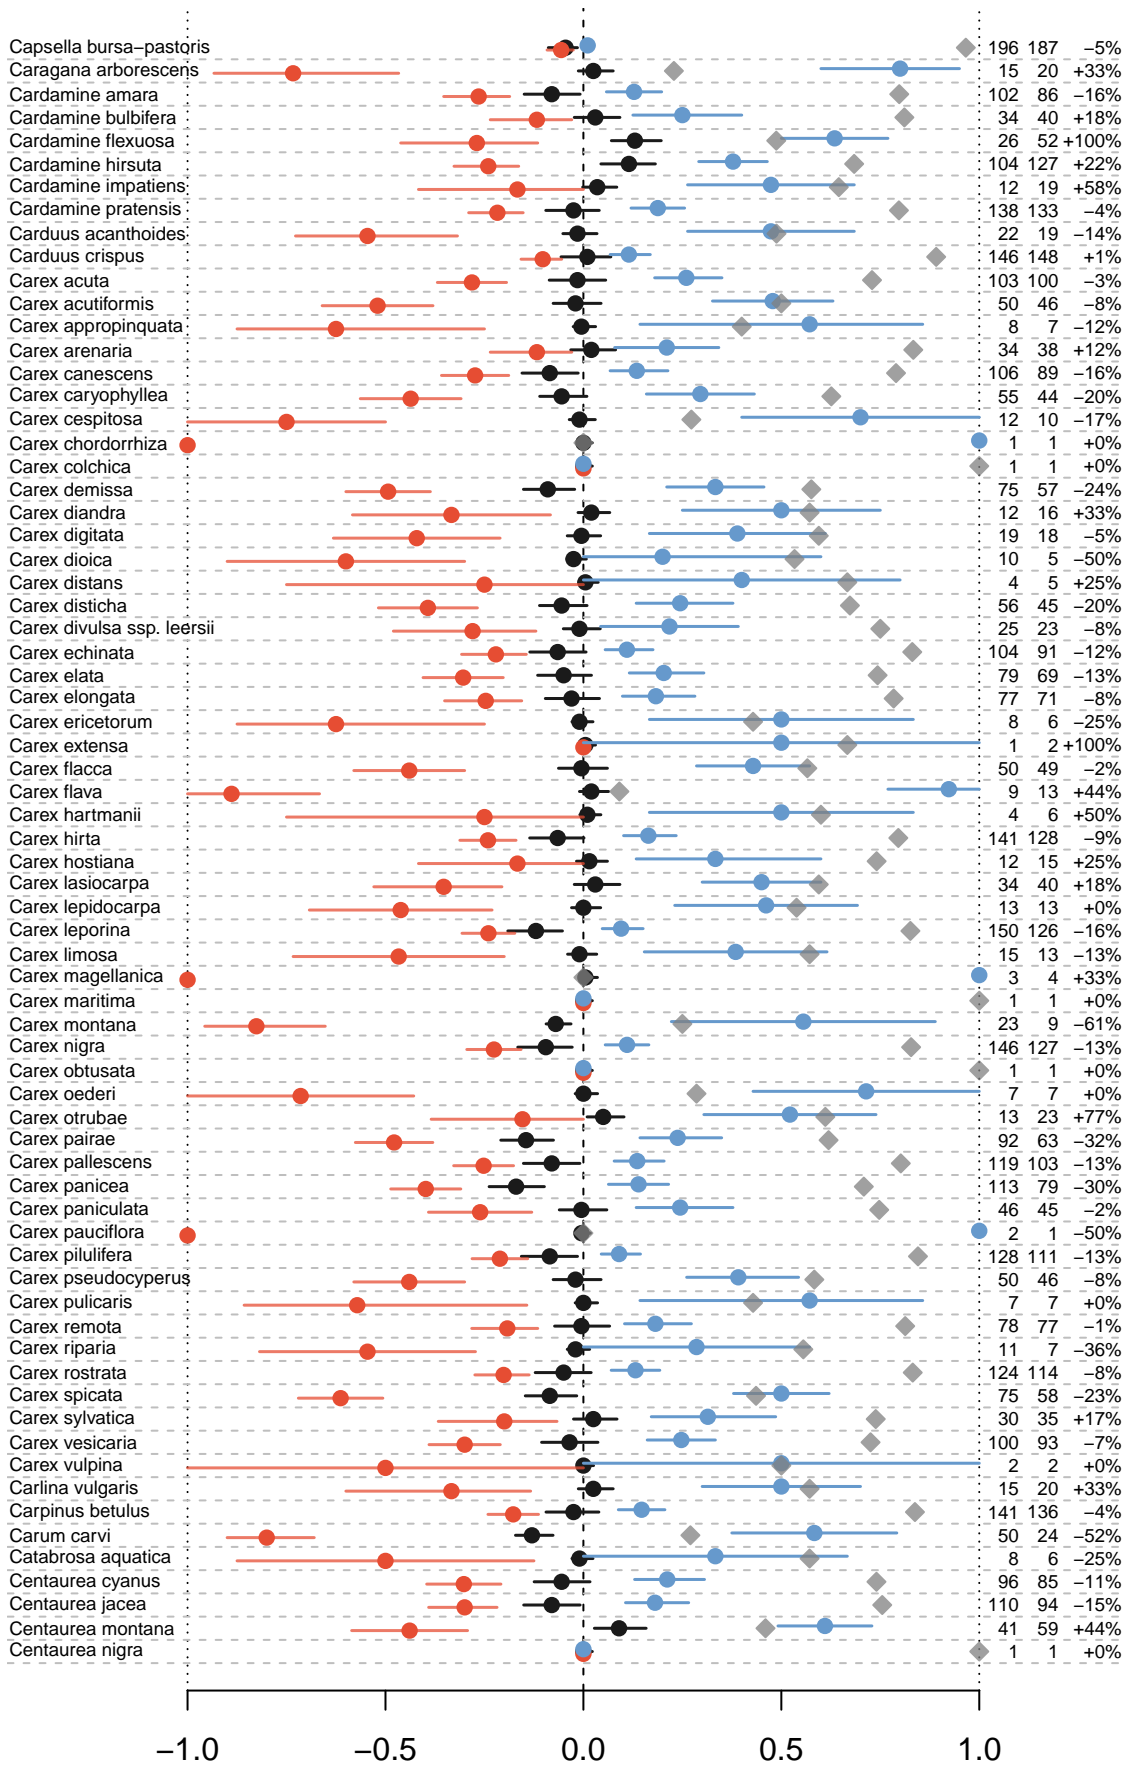

Rates

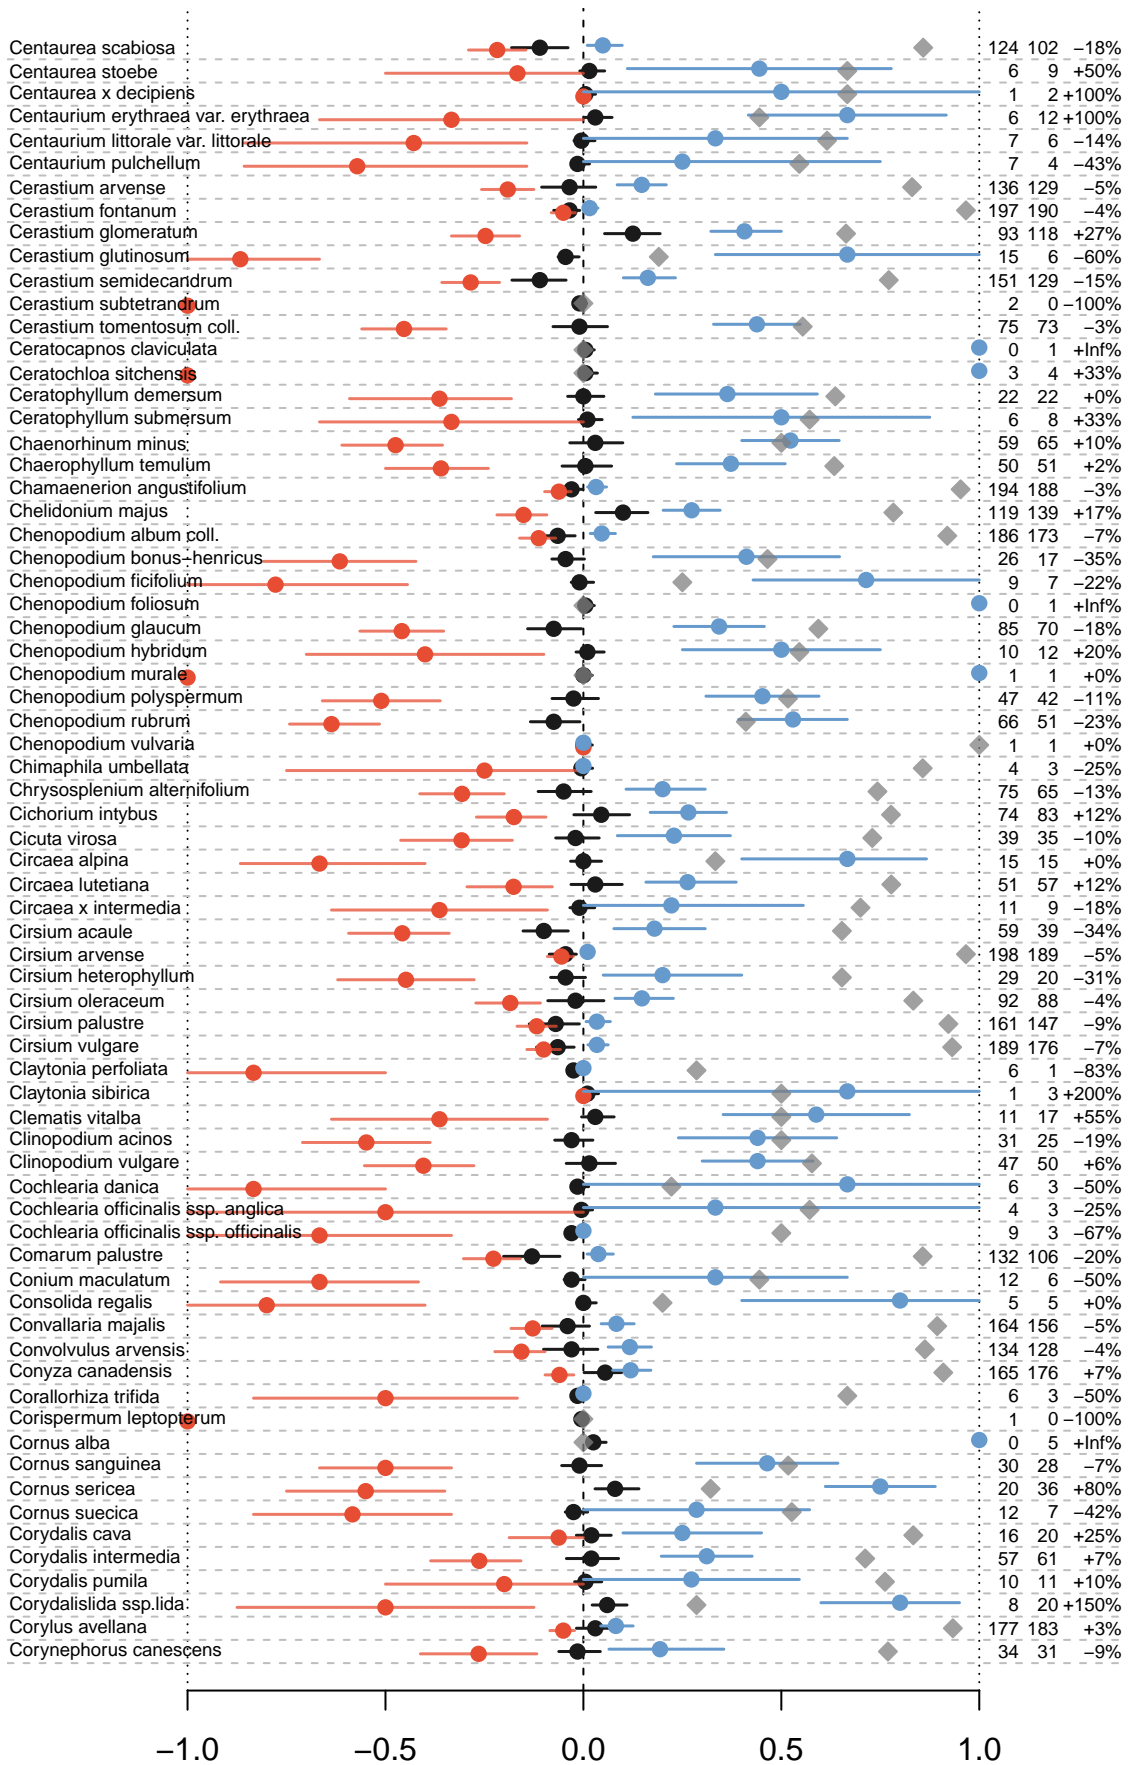

Rates

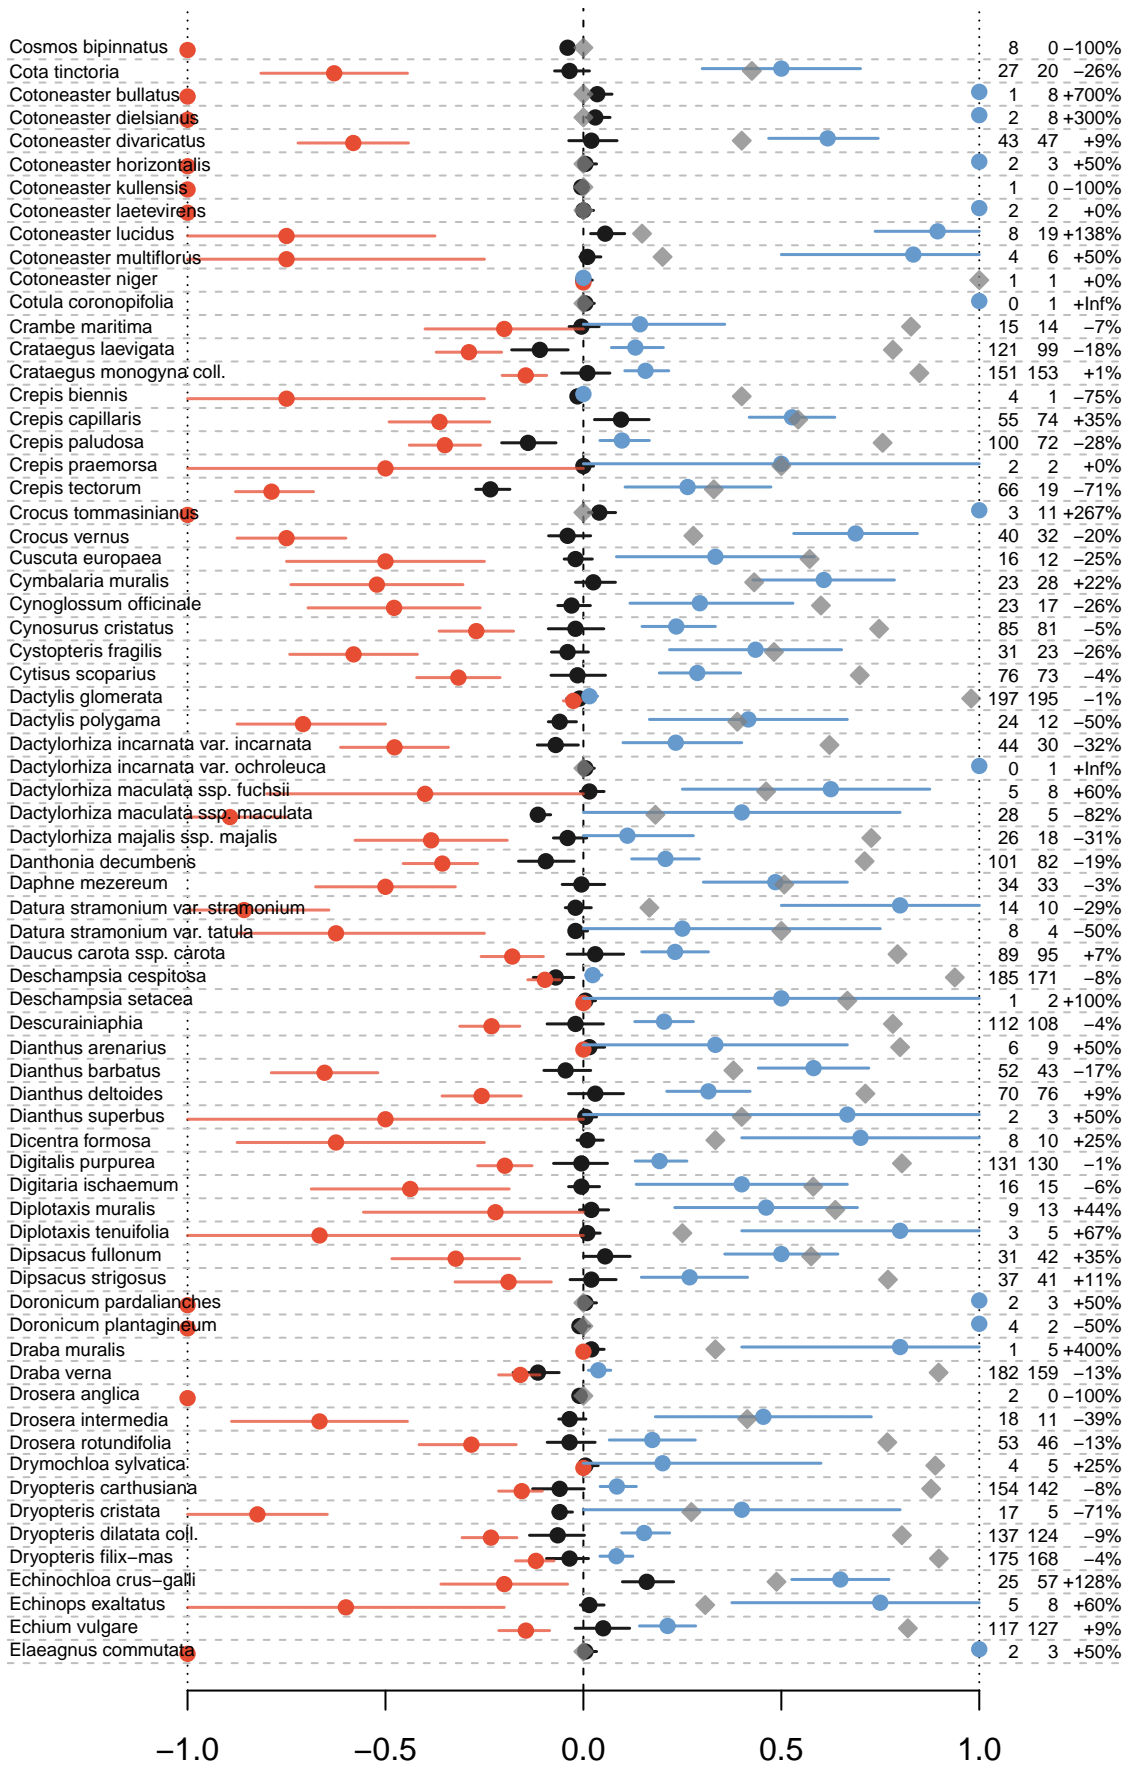

Rates

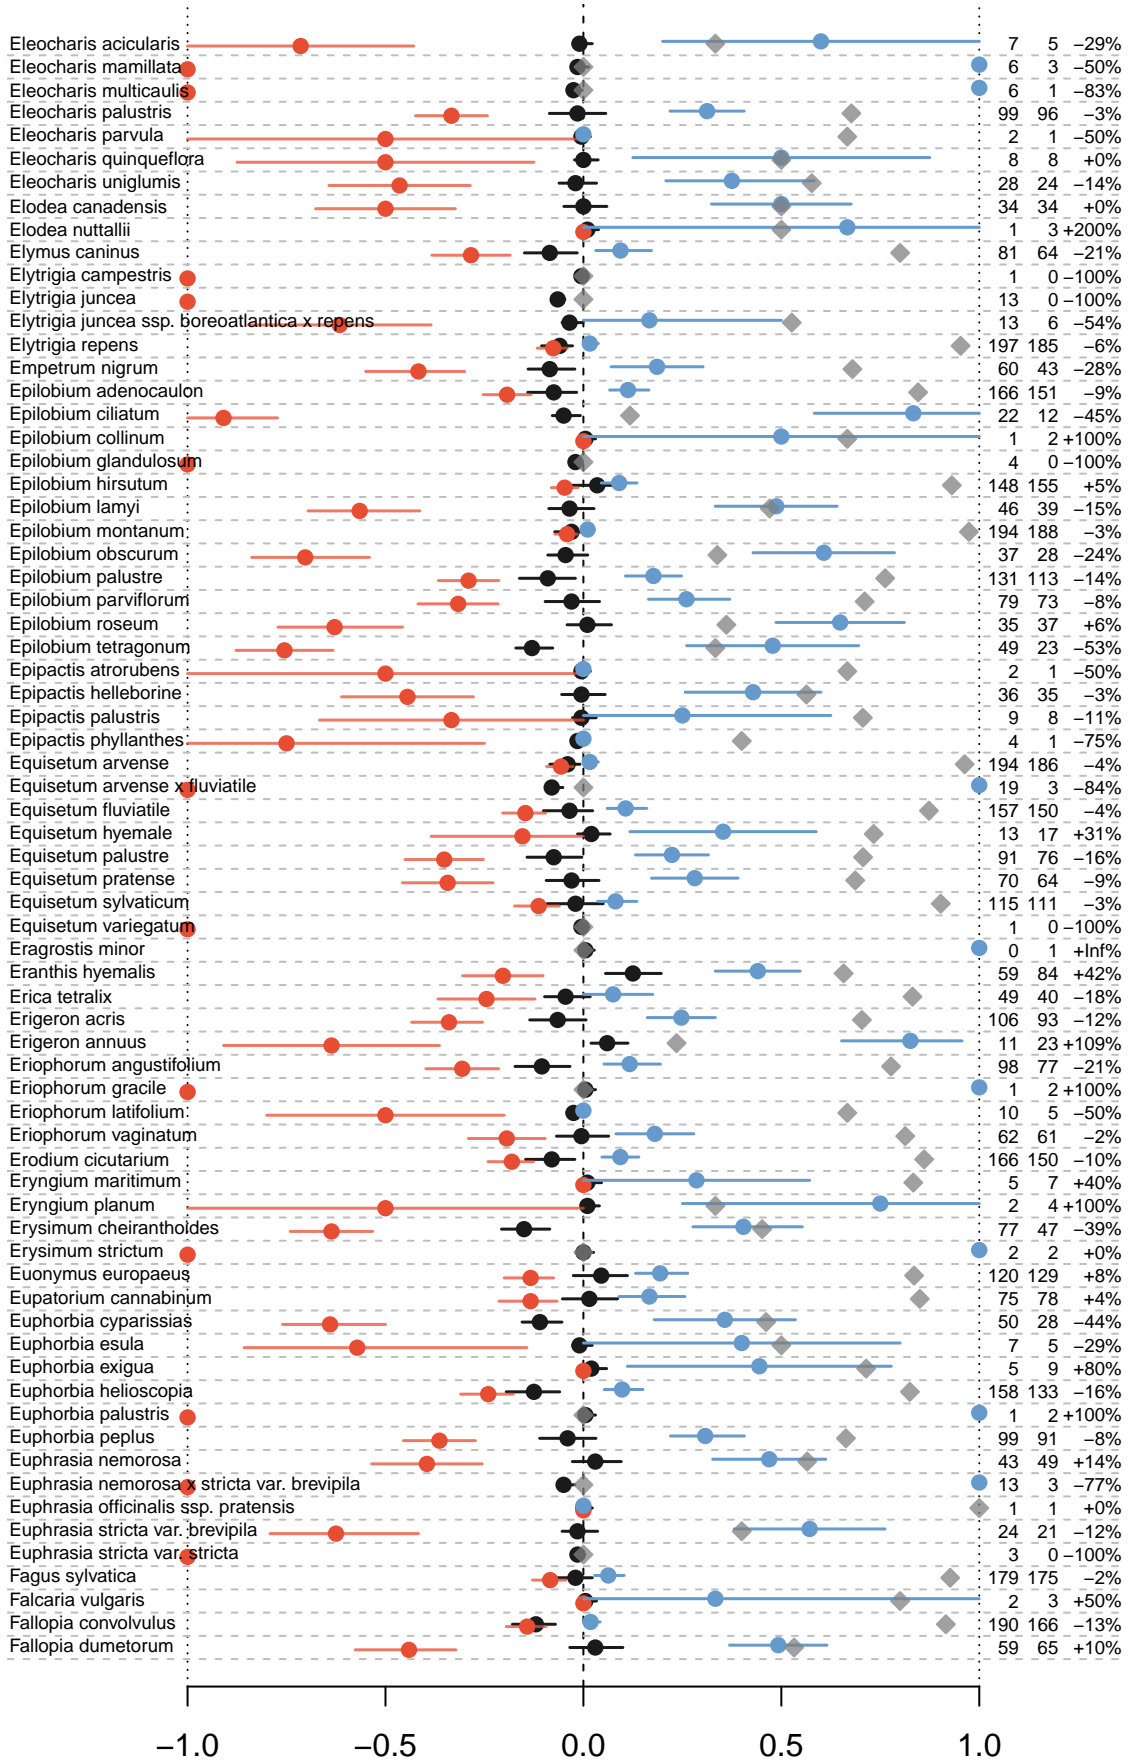

Rates

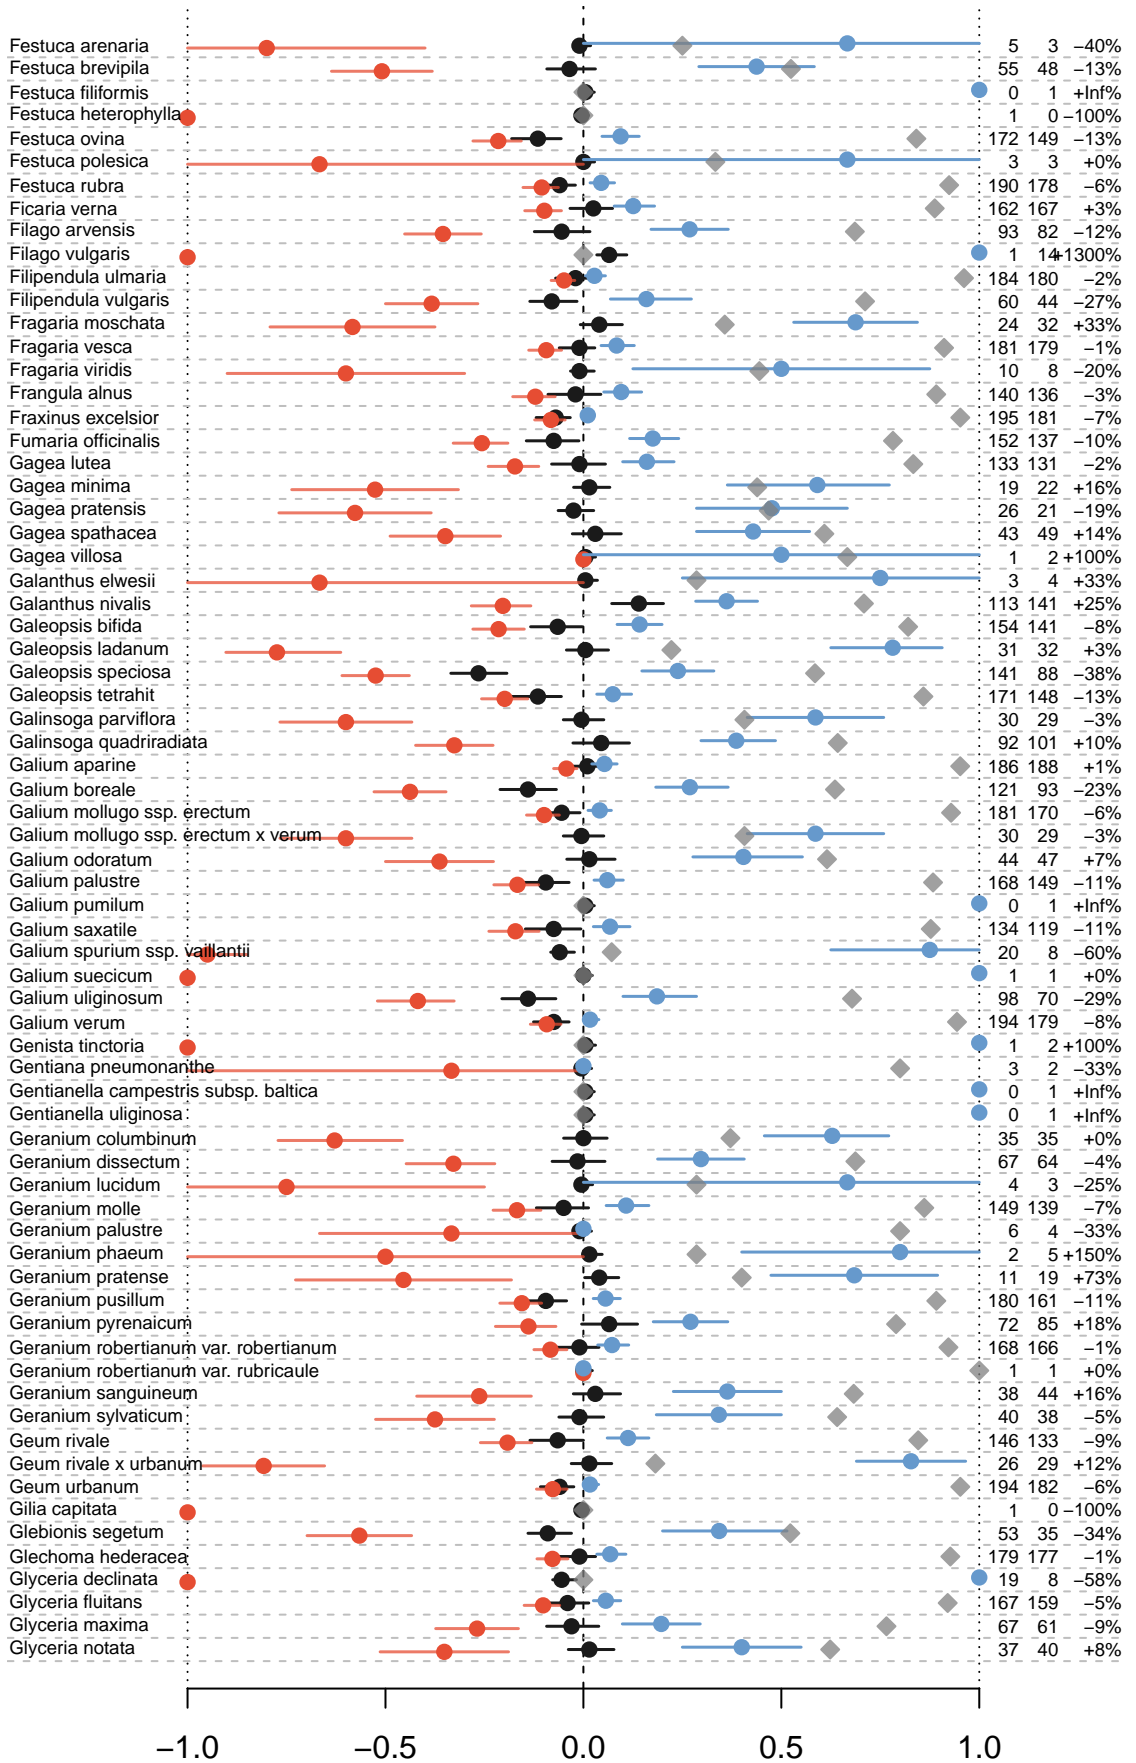

Rates



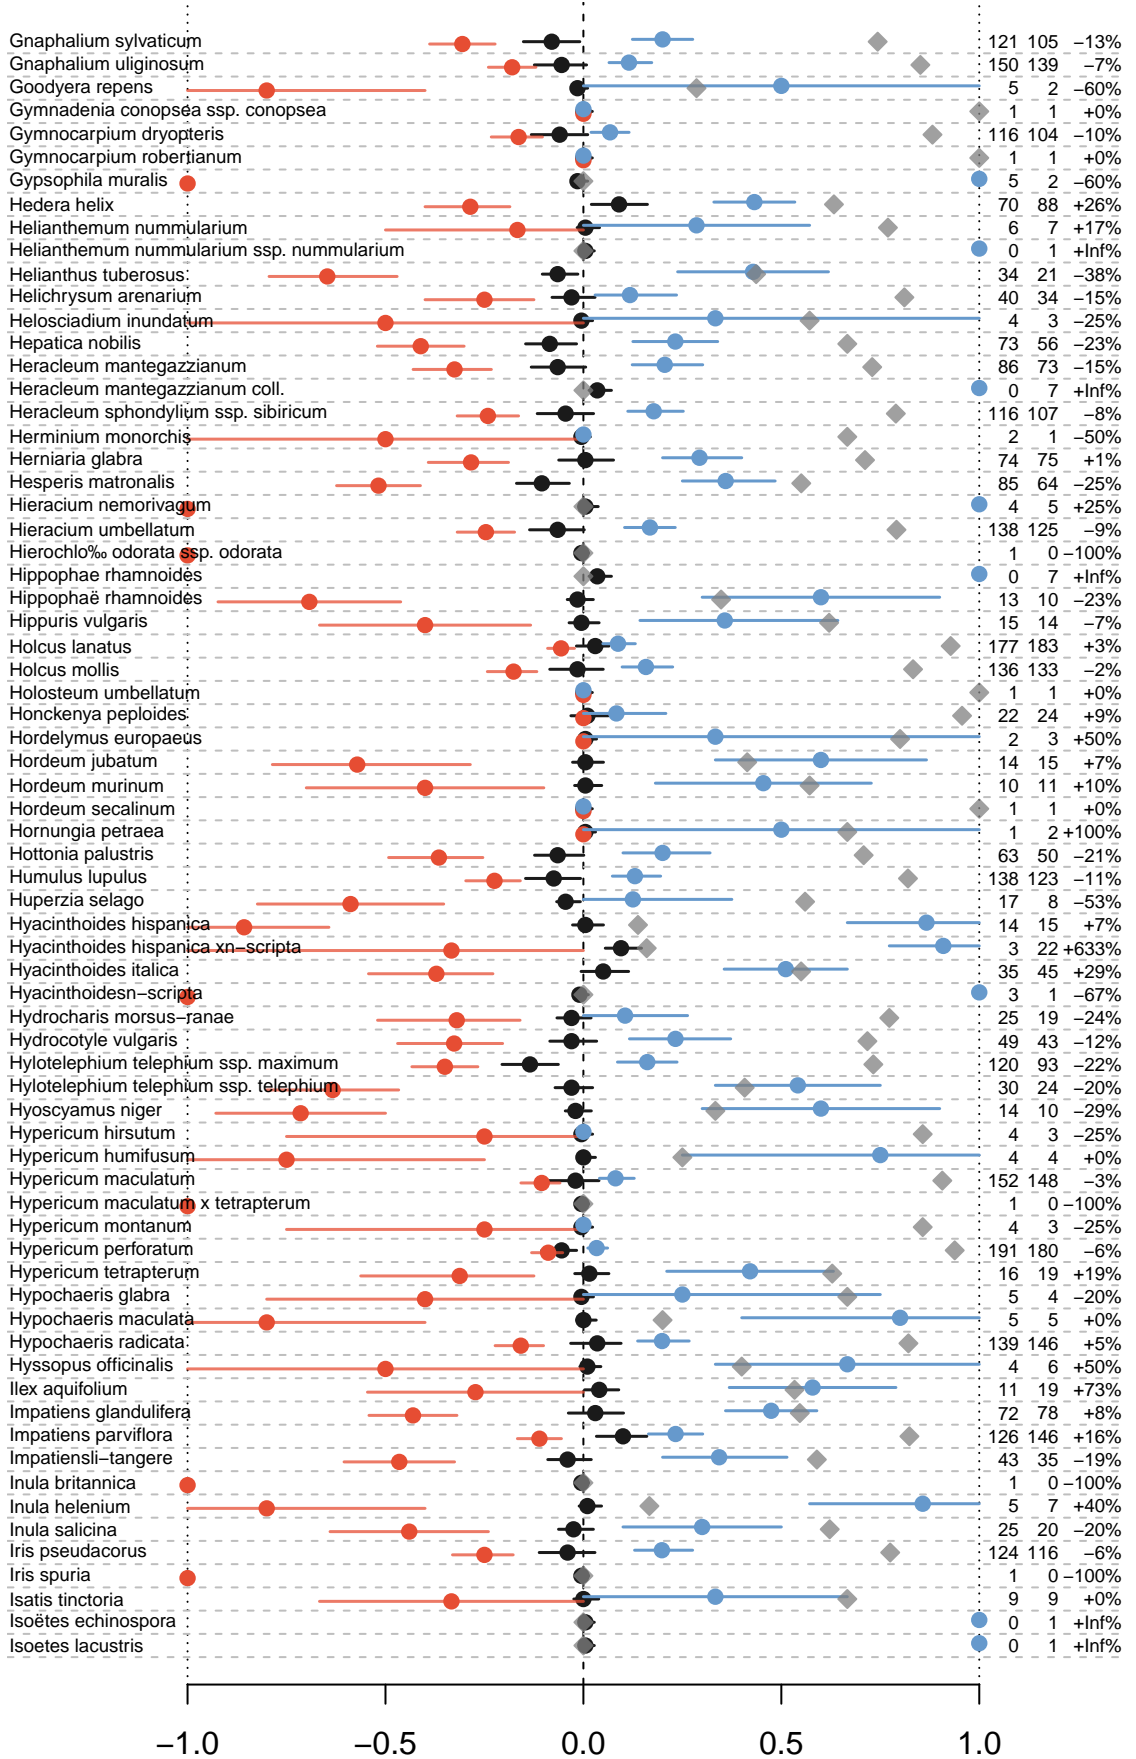

Rates

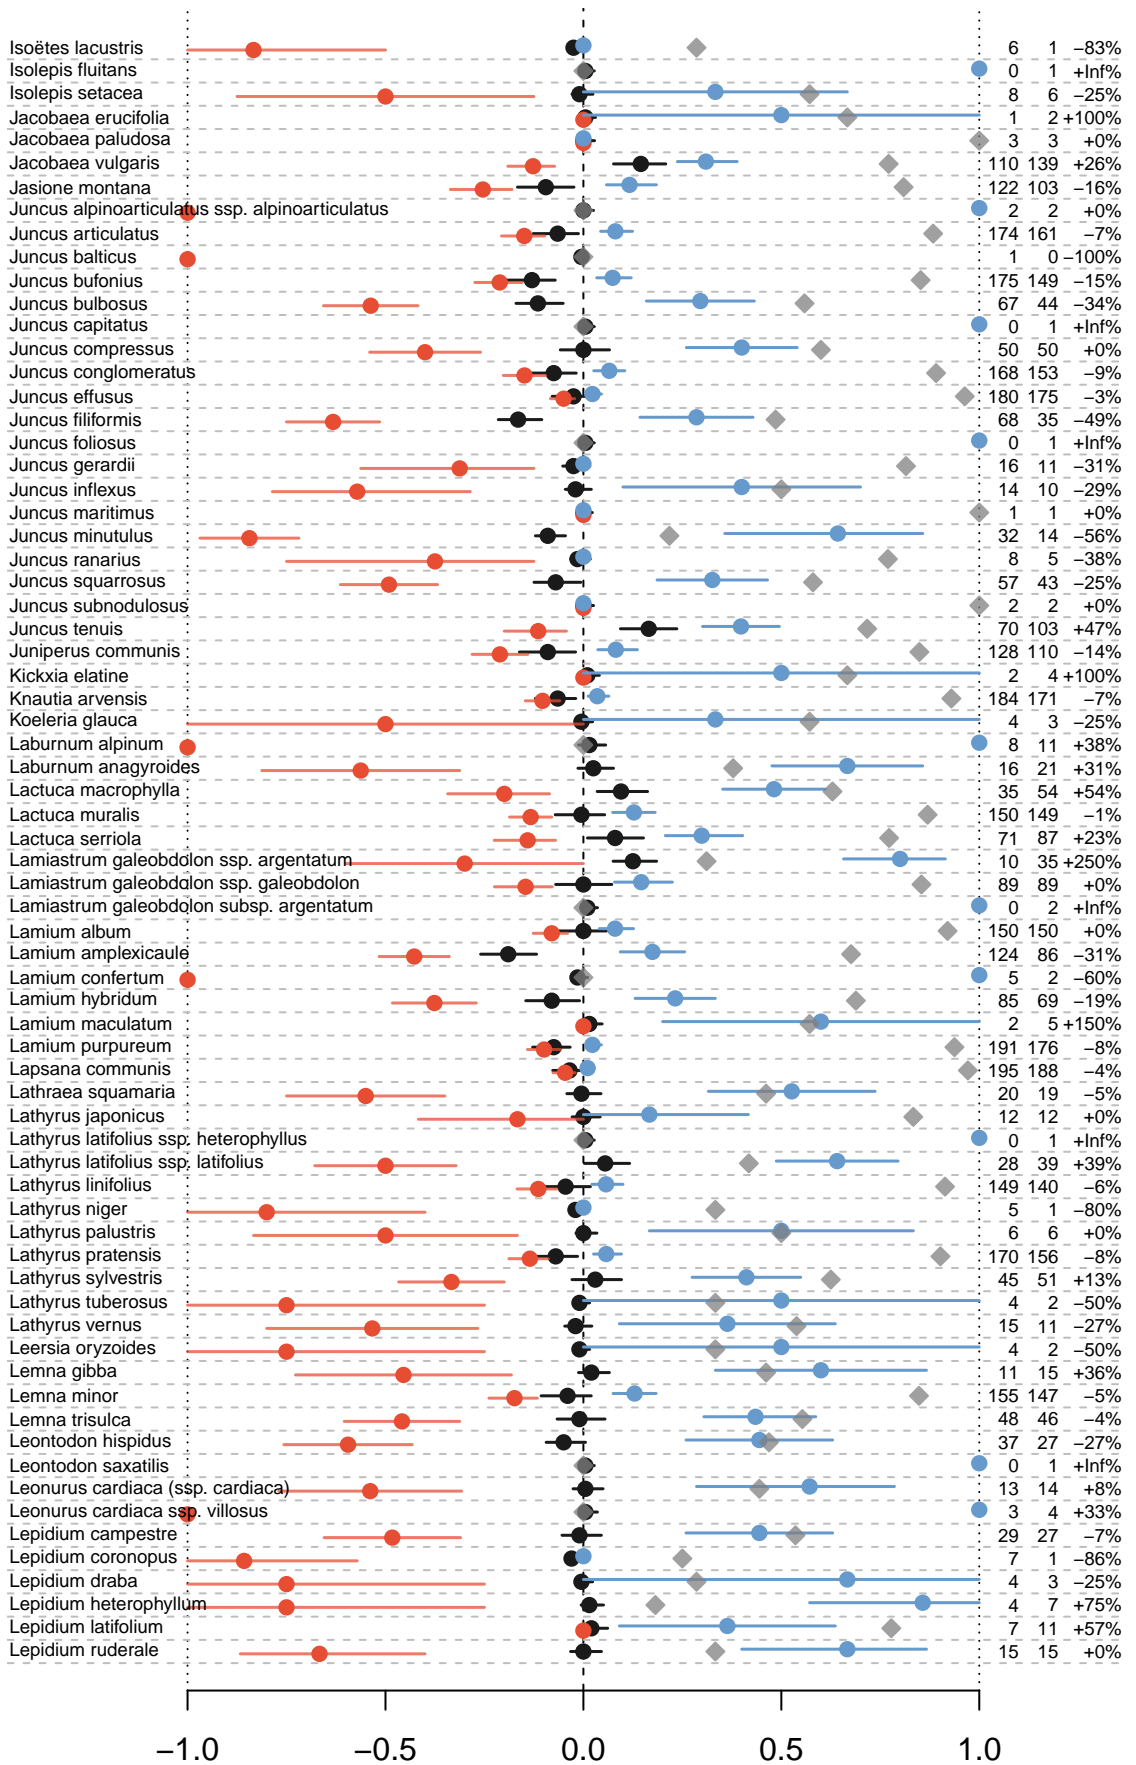

Rates

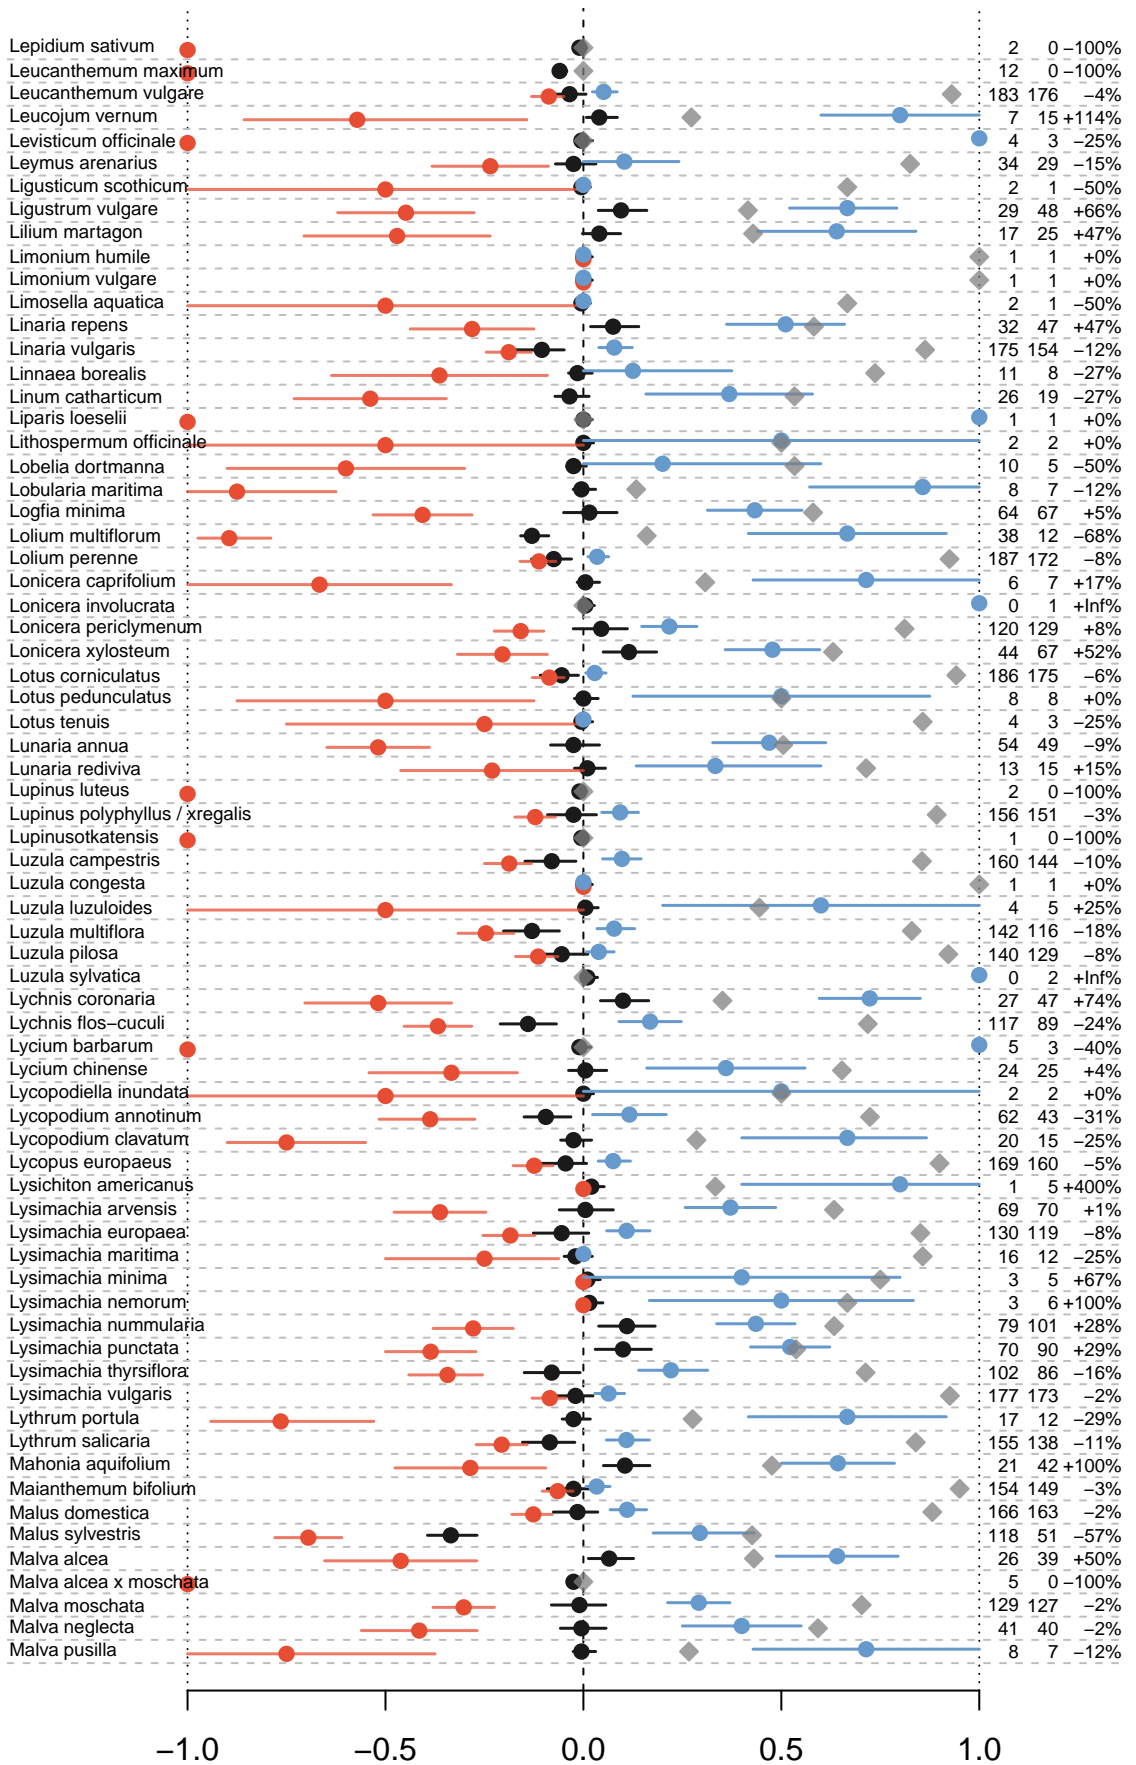

Rates

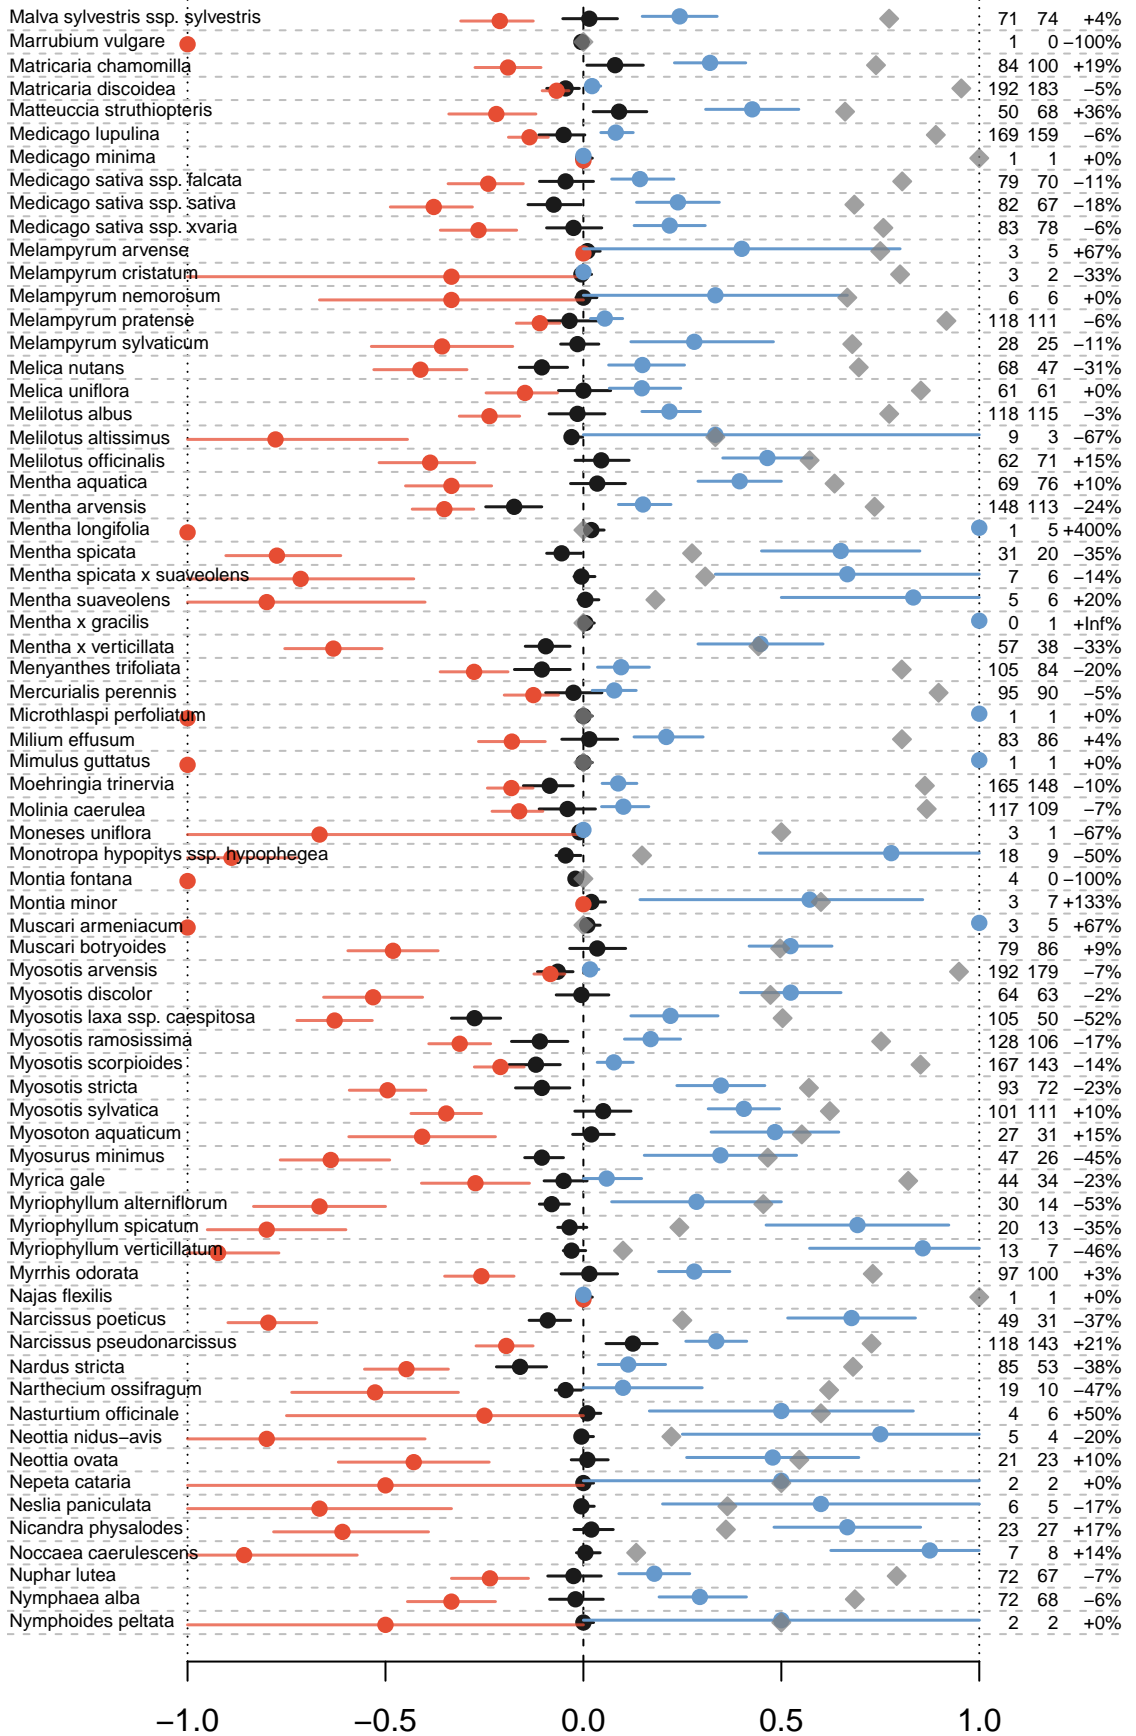

Rates

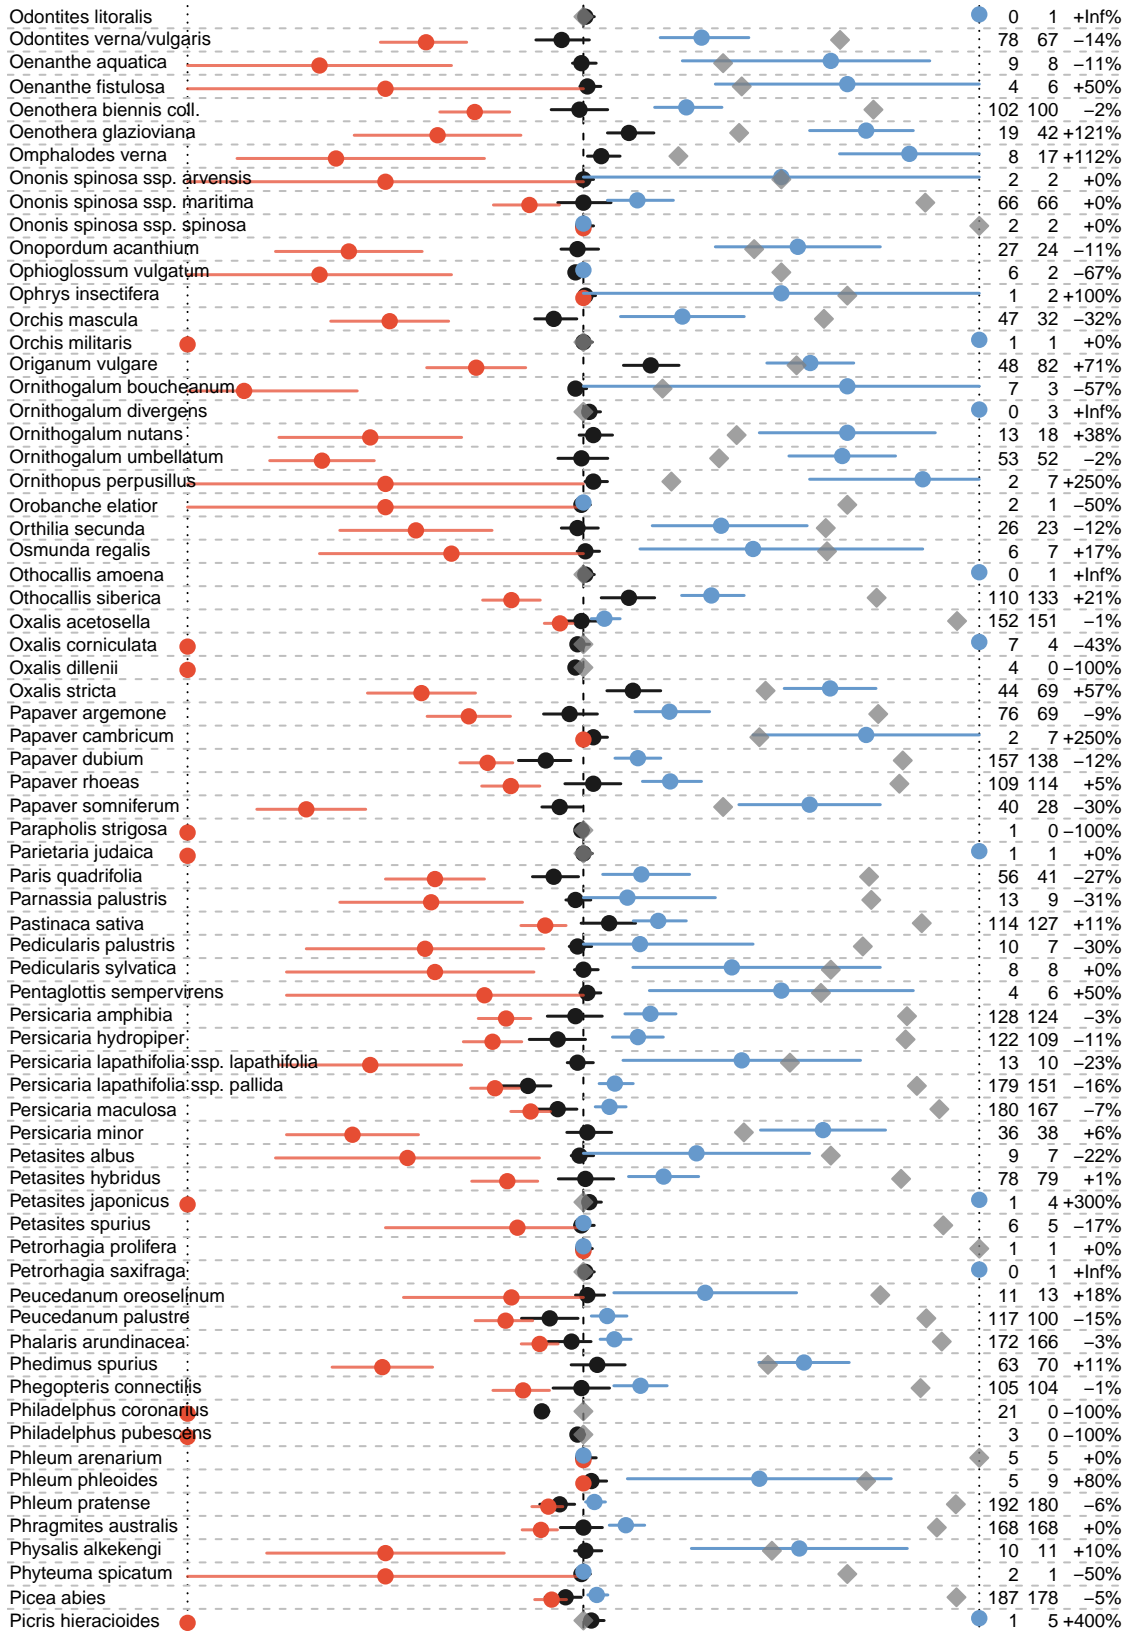

Rates

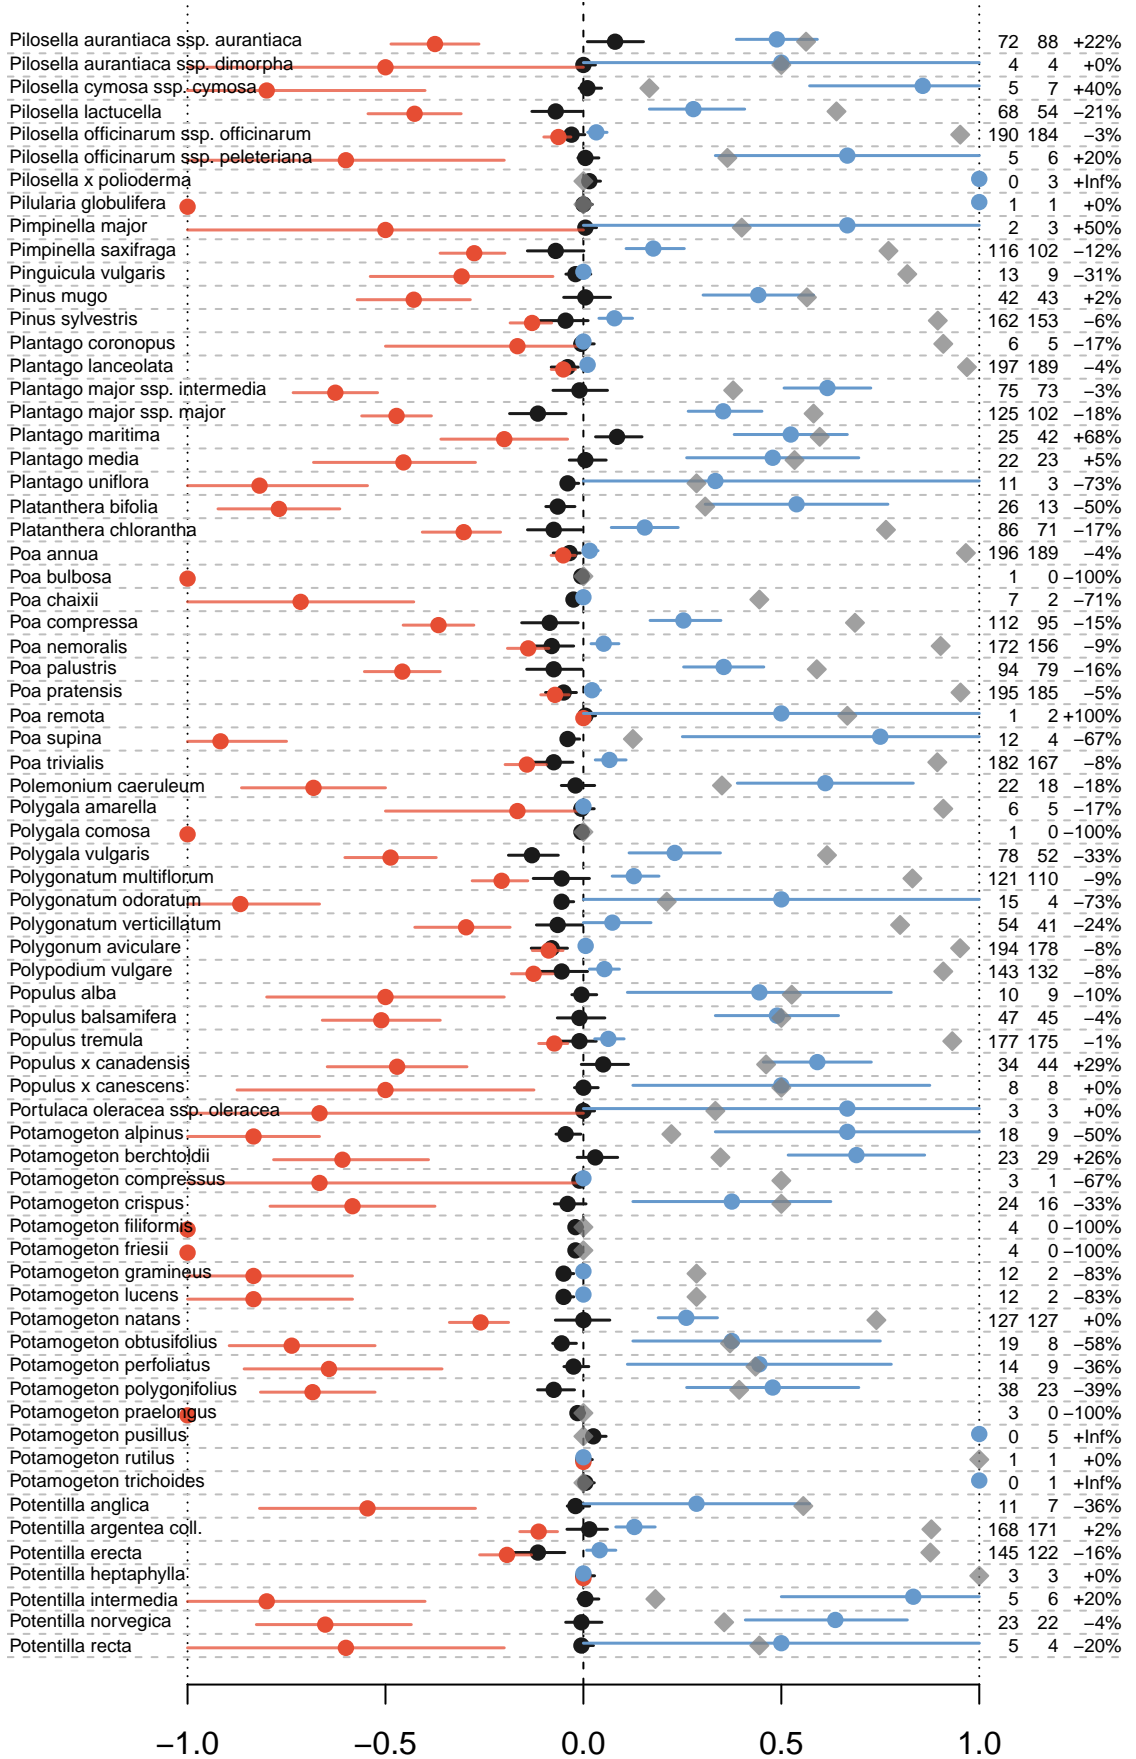

Rates

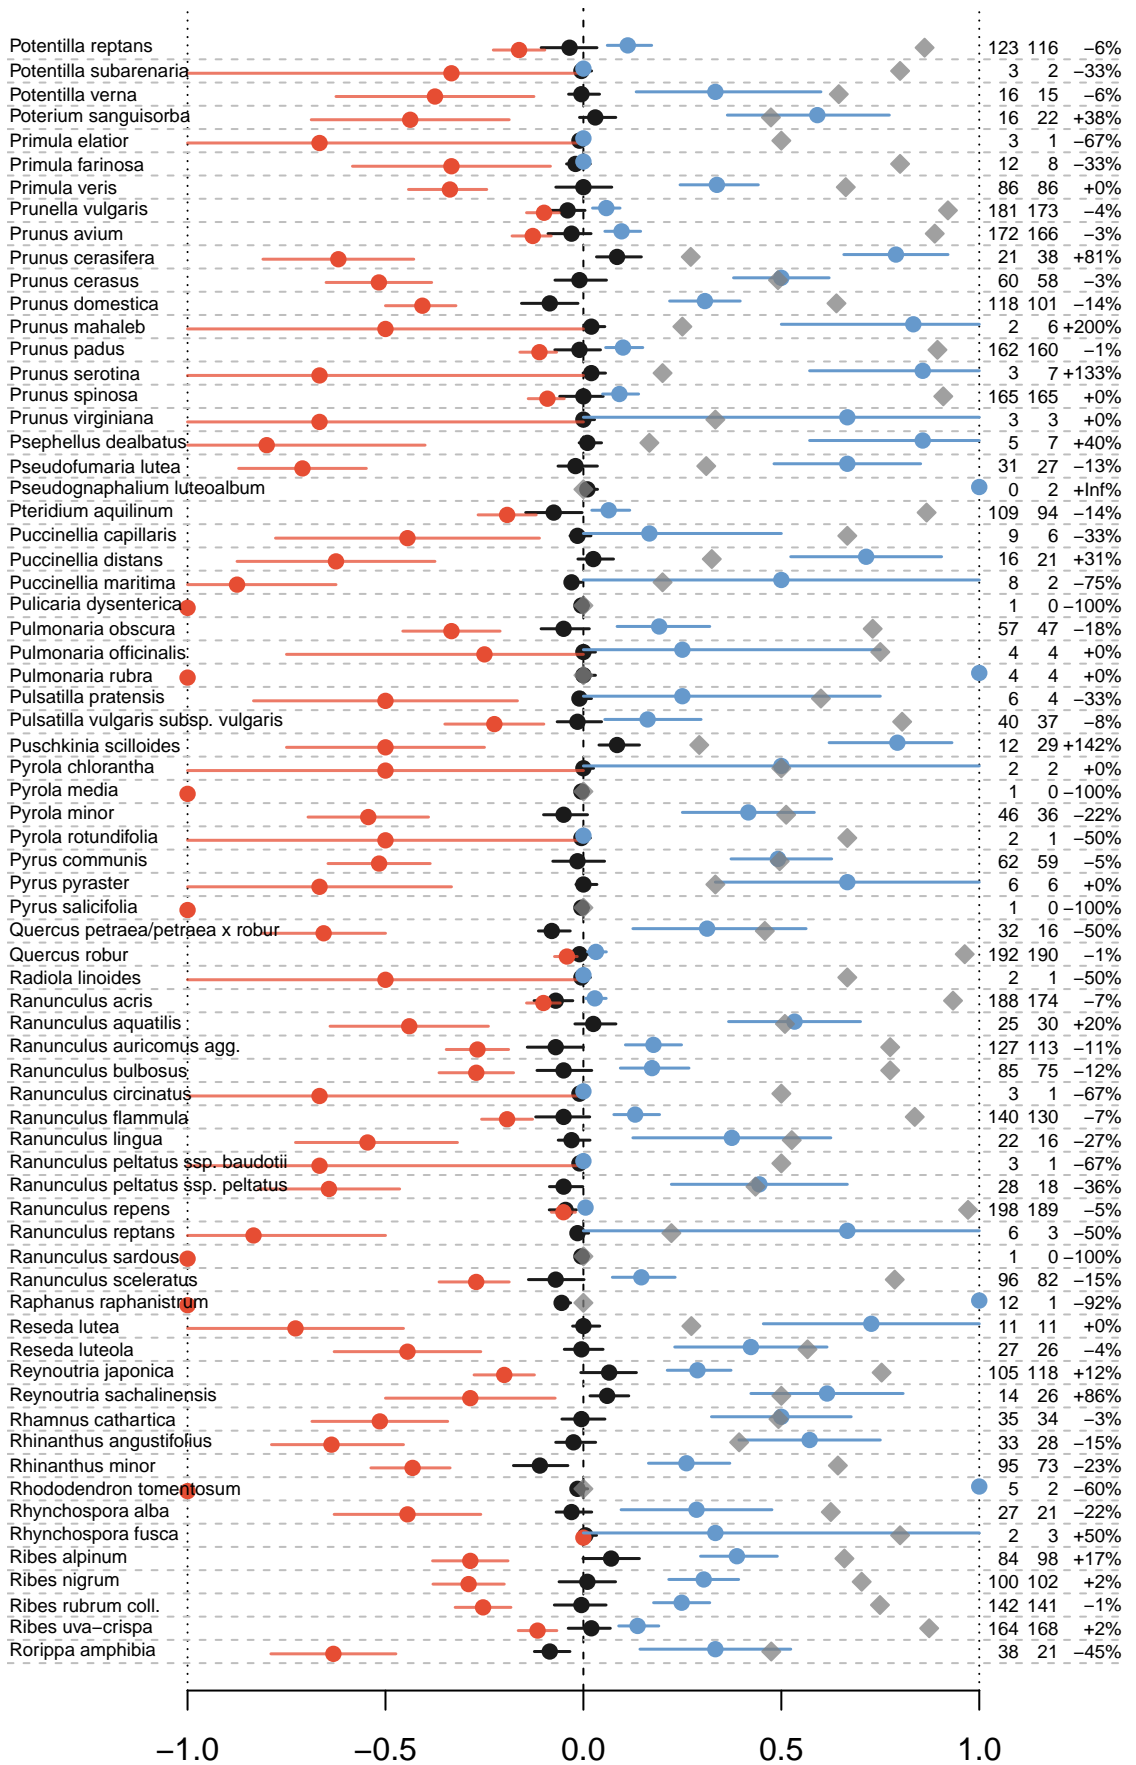

Rates

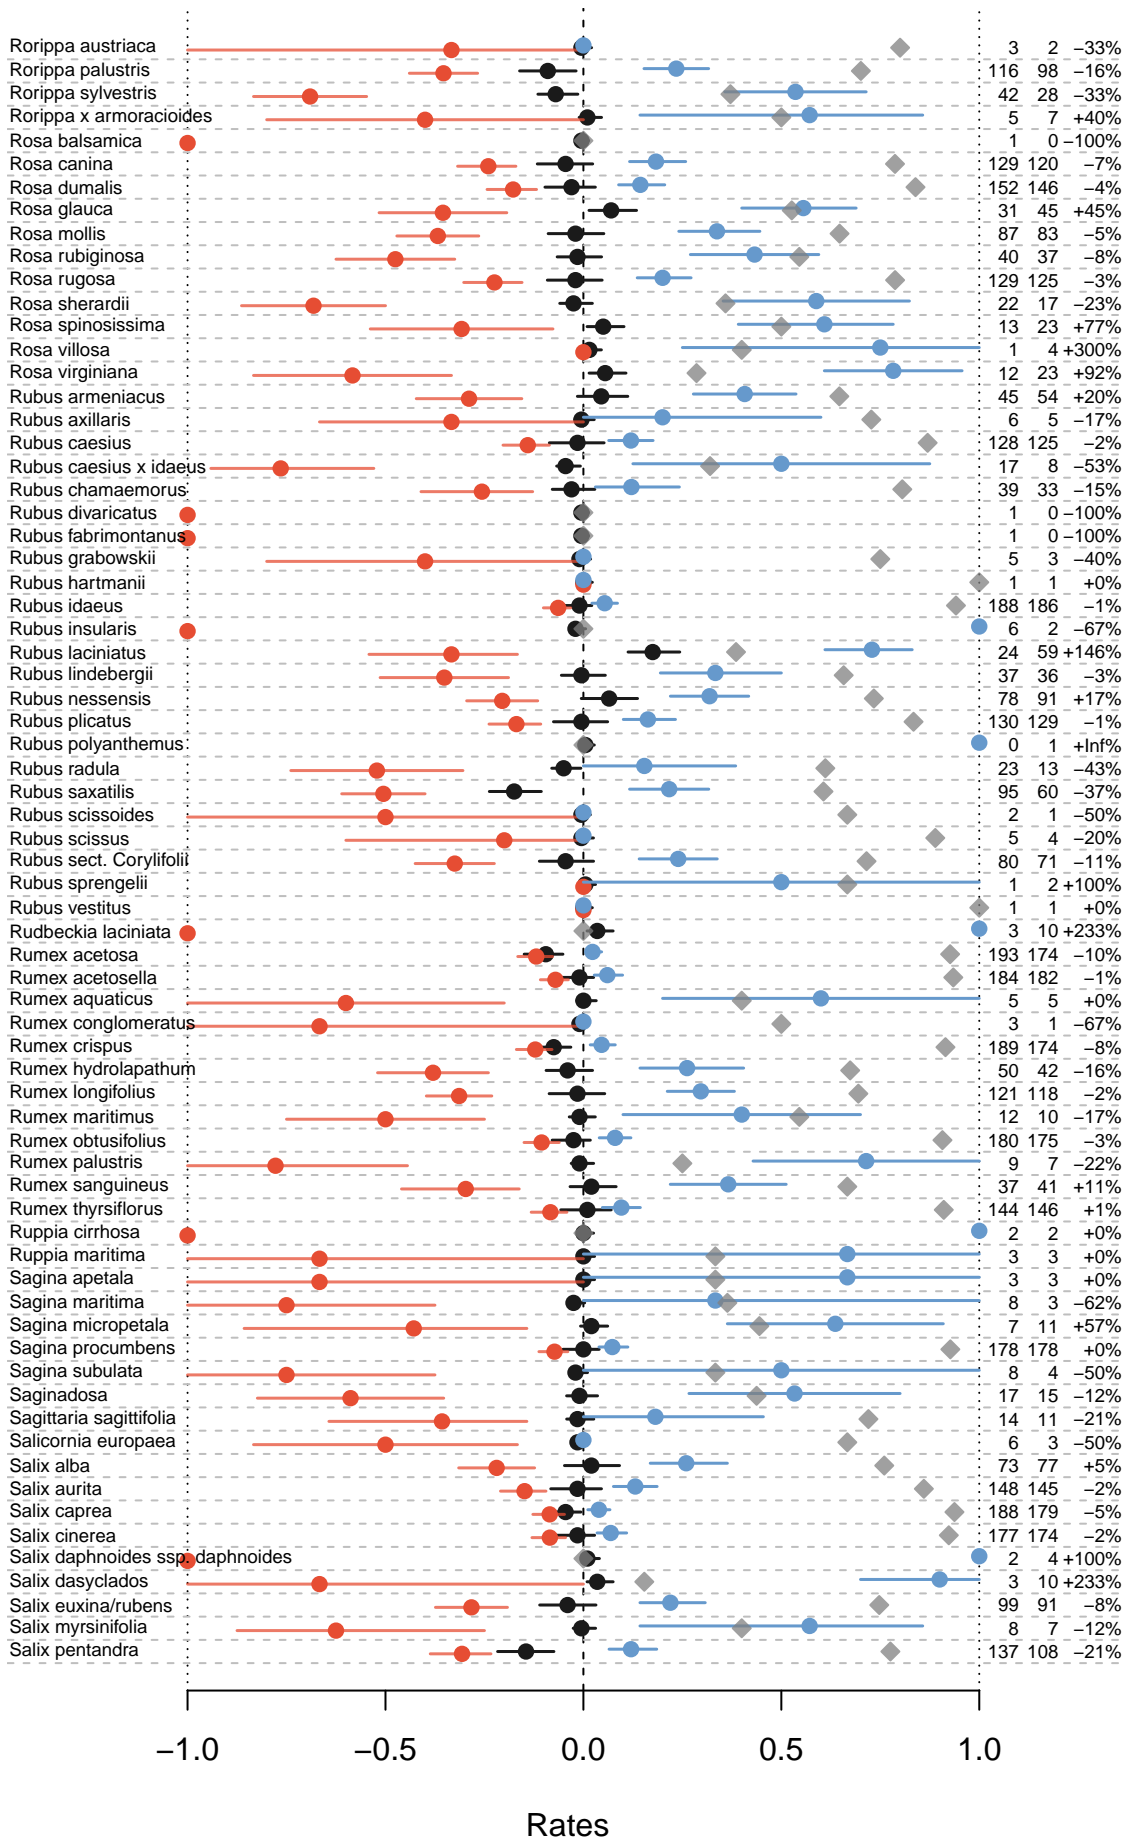



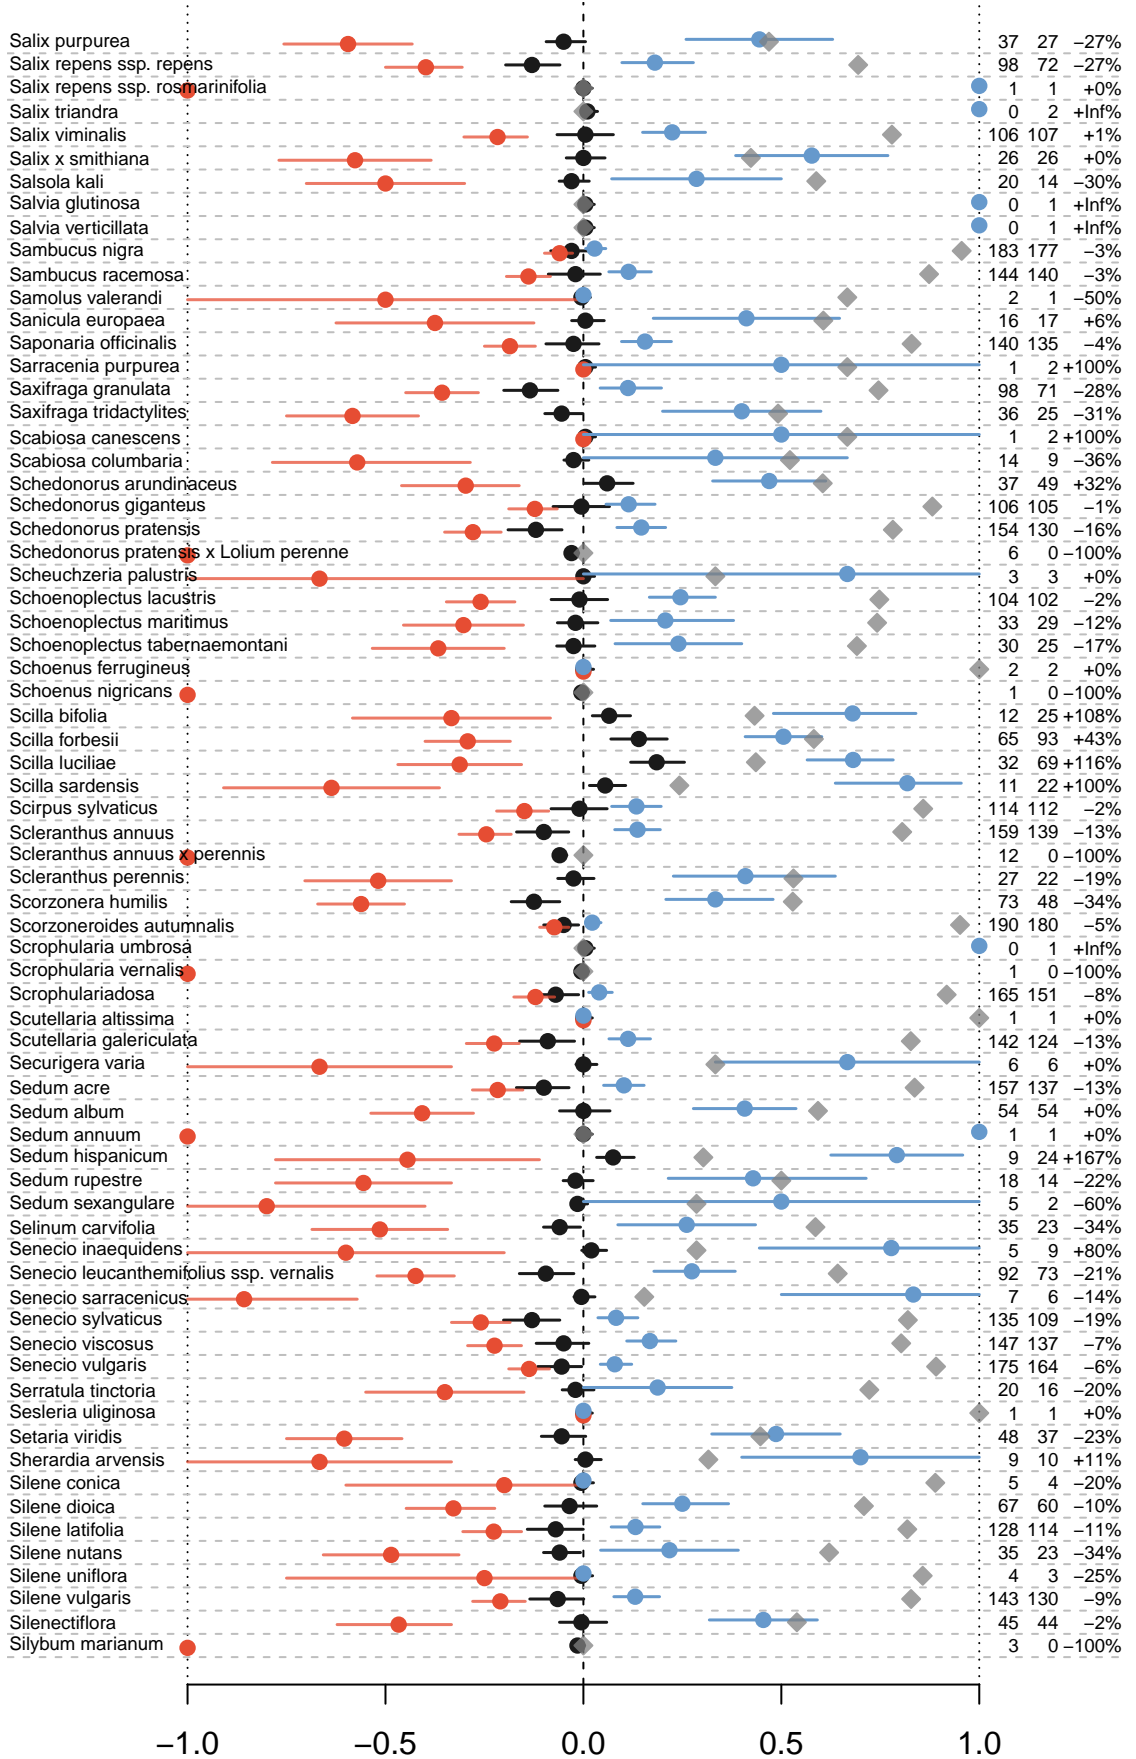

Rates

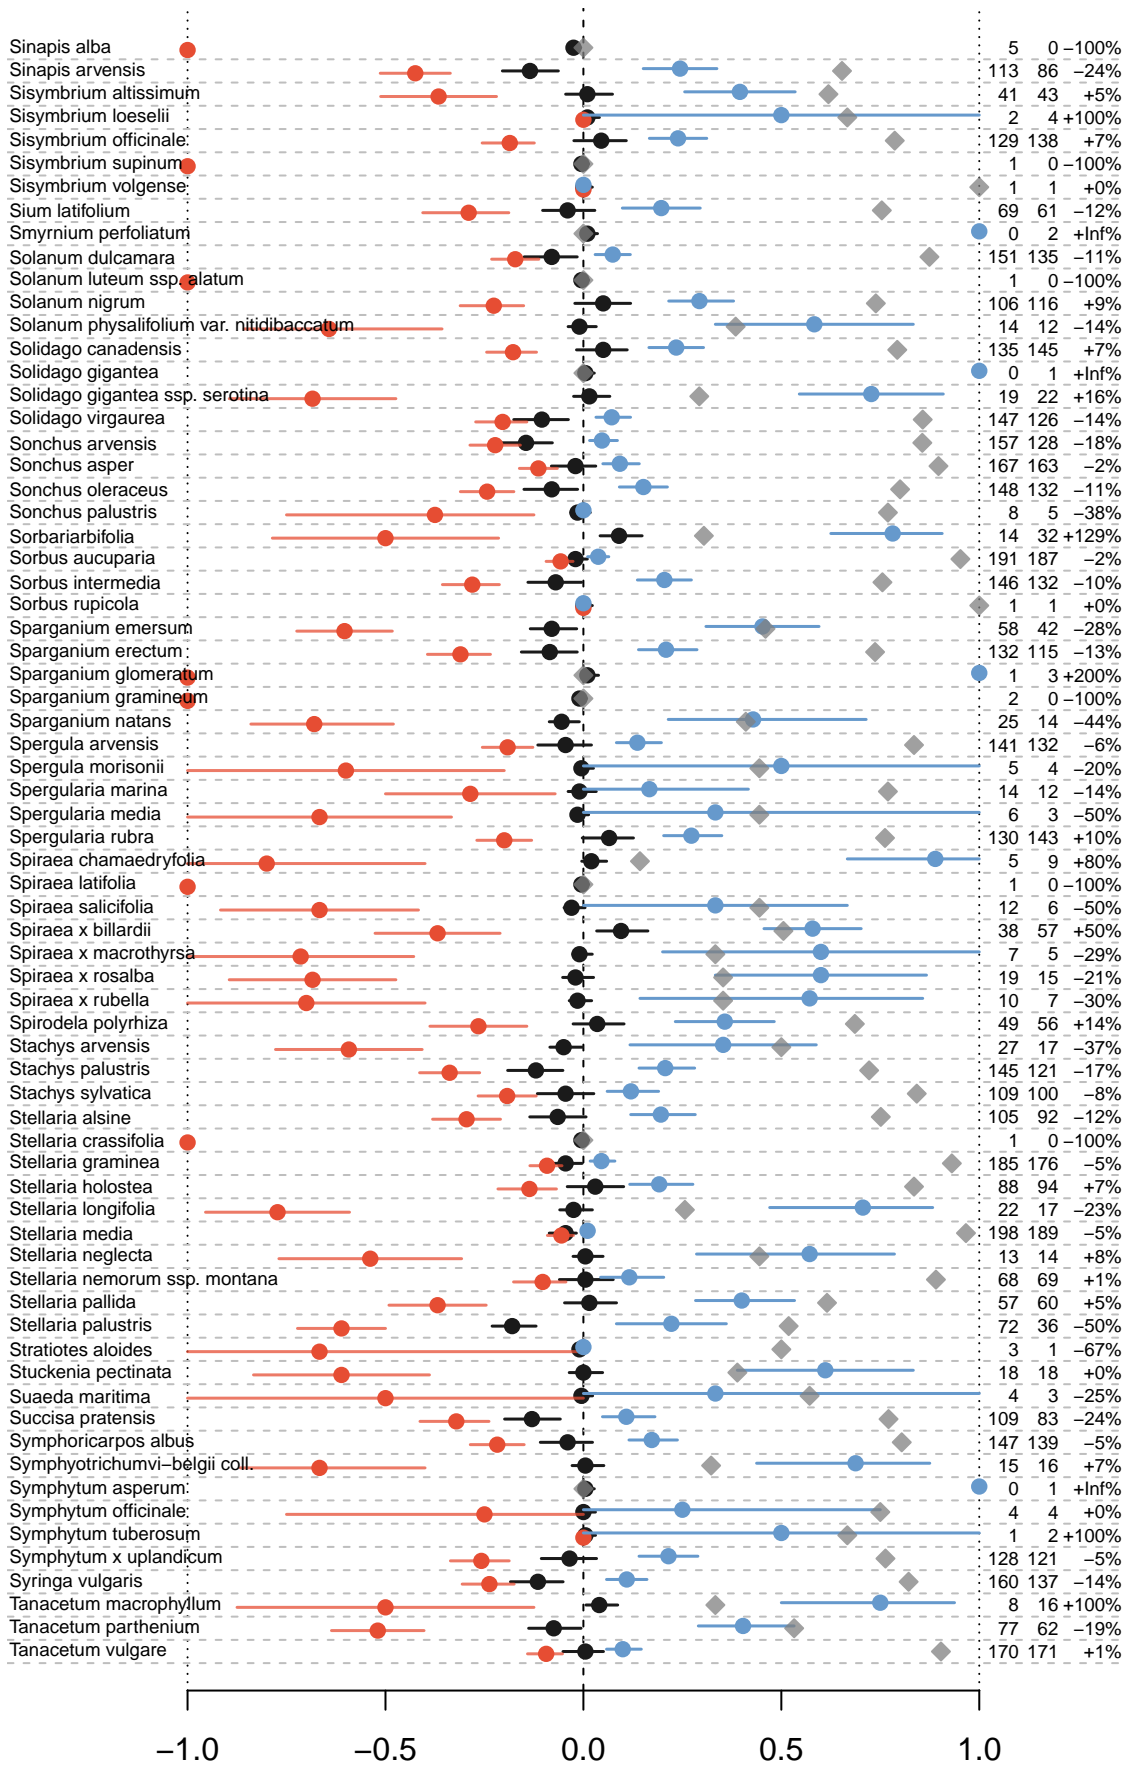

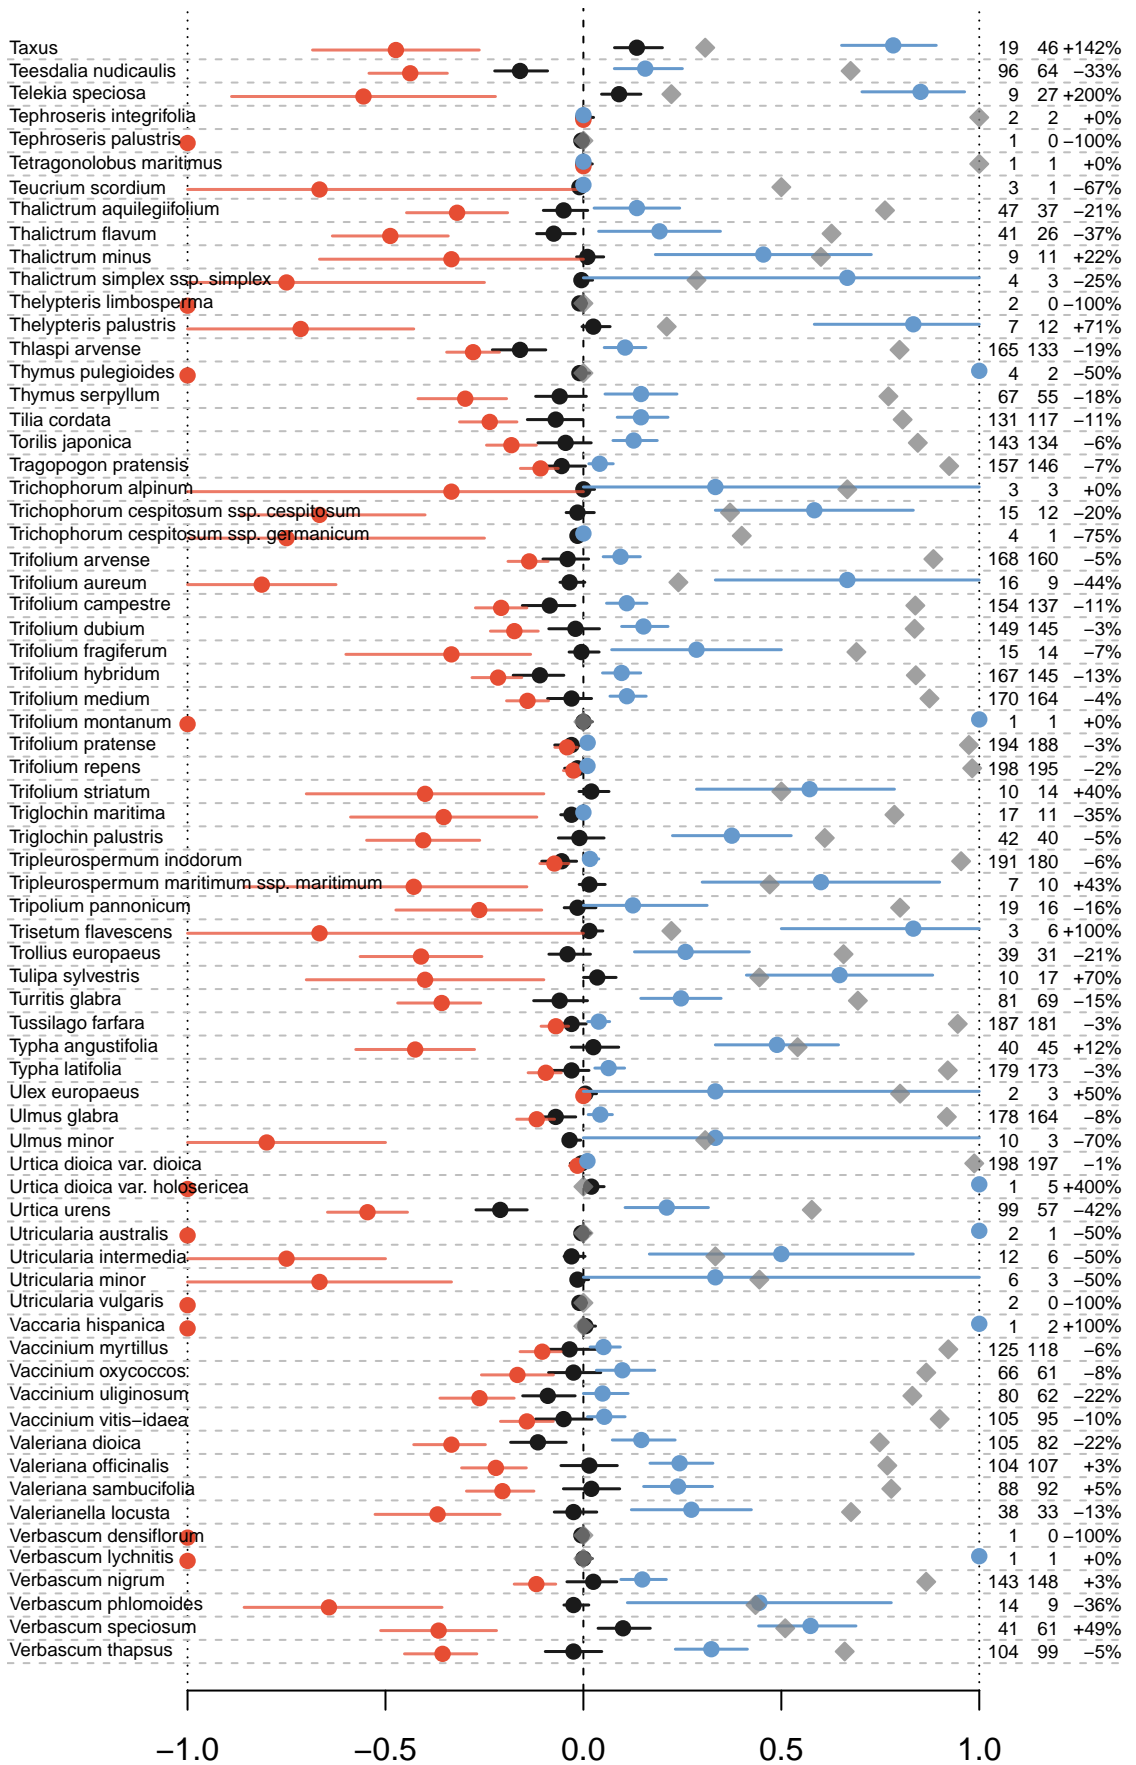

Rates

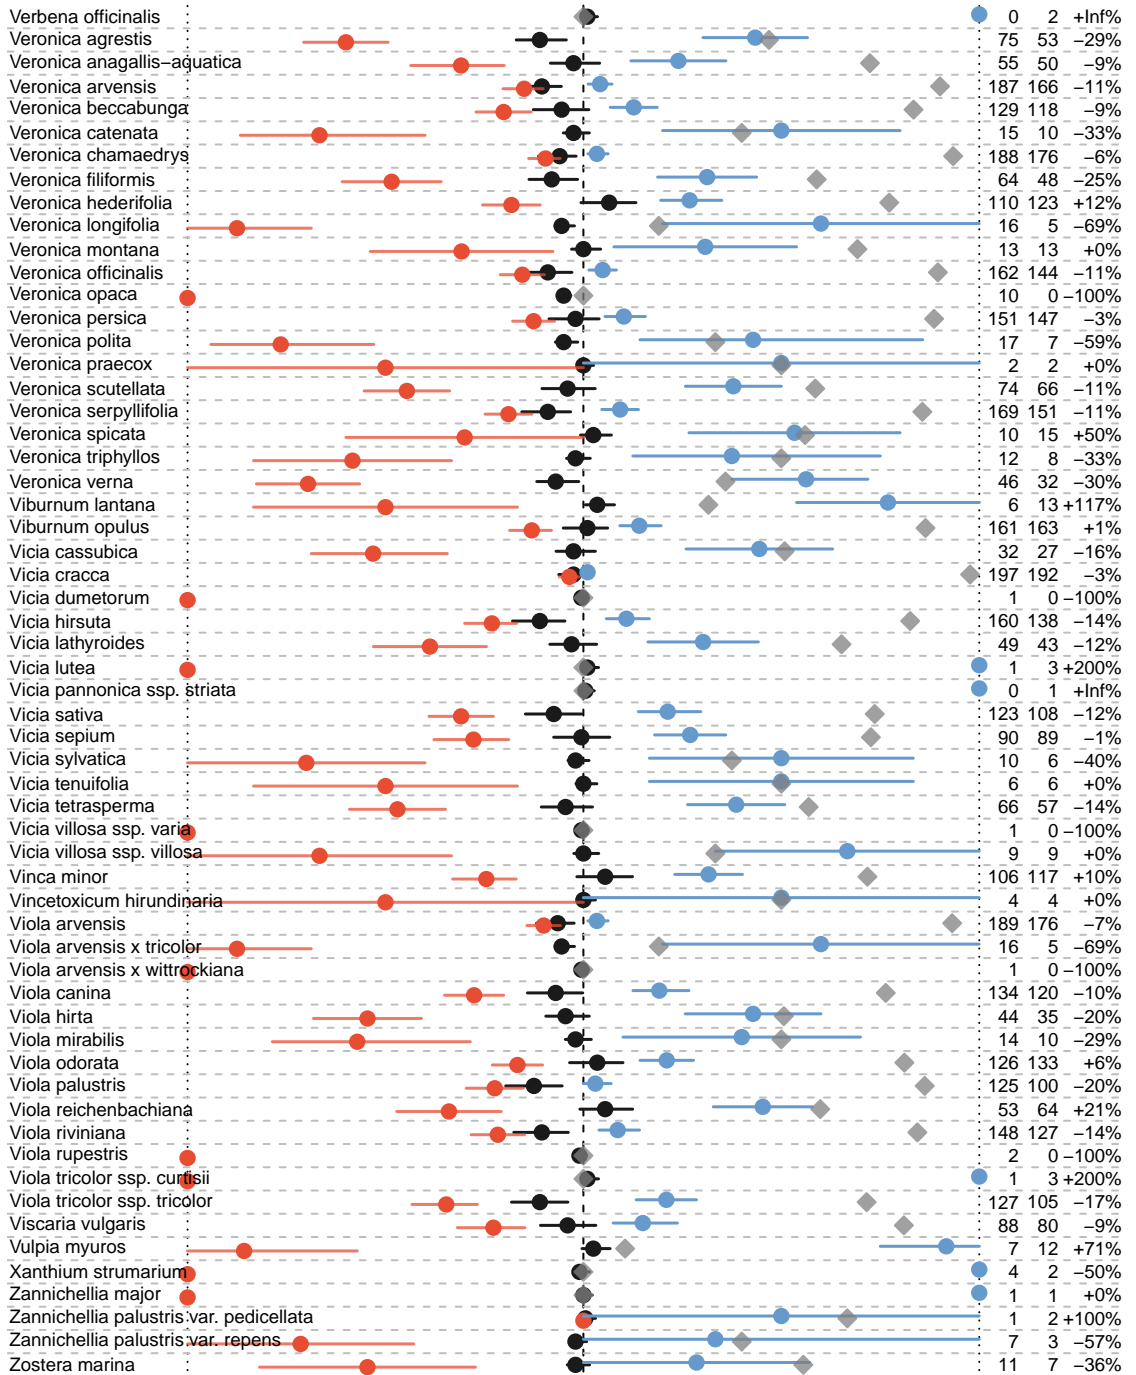

Rates
