# Supplementary figures and images for: Recent changes in the frequency of plant species and vegetation types in Scania, S Sweden, compared to changes during the twentieth century
Source: Springer Nature journal article supplement (doi:10.1007/s10531-019-01906-5), 2019-11-26

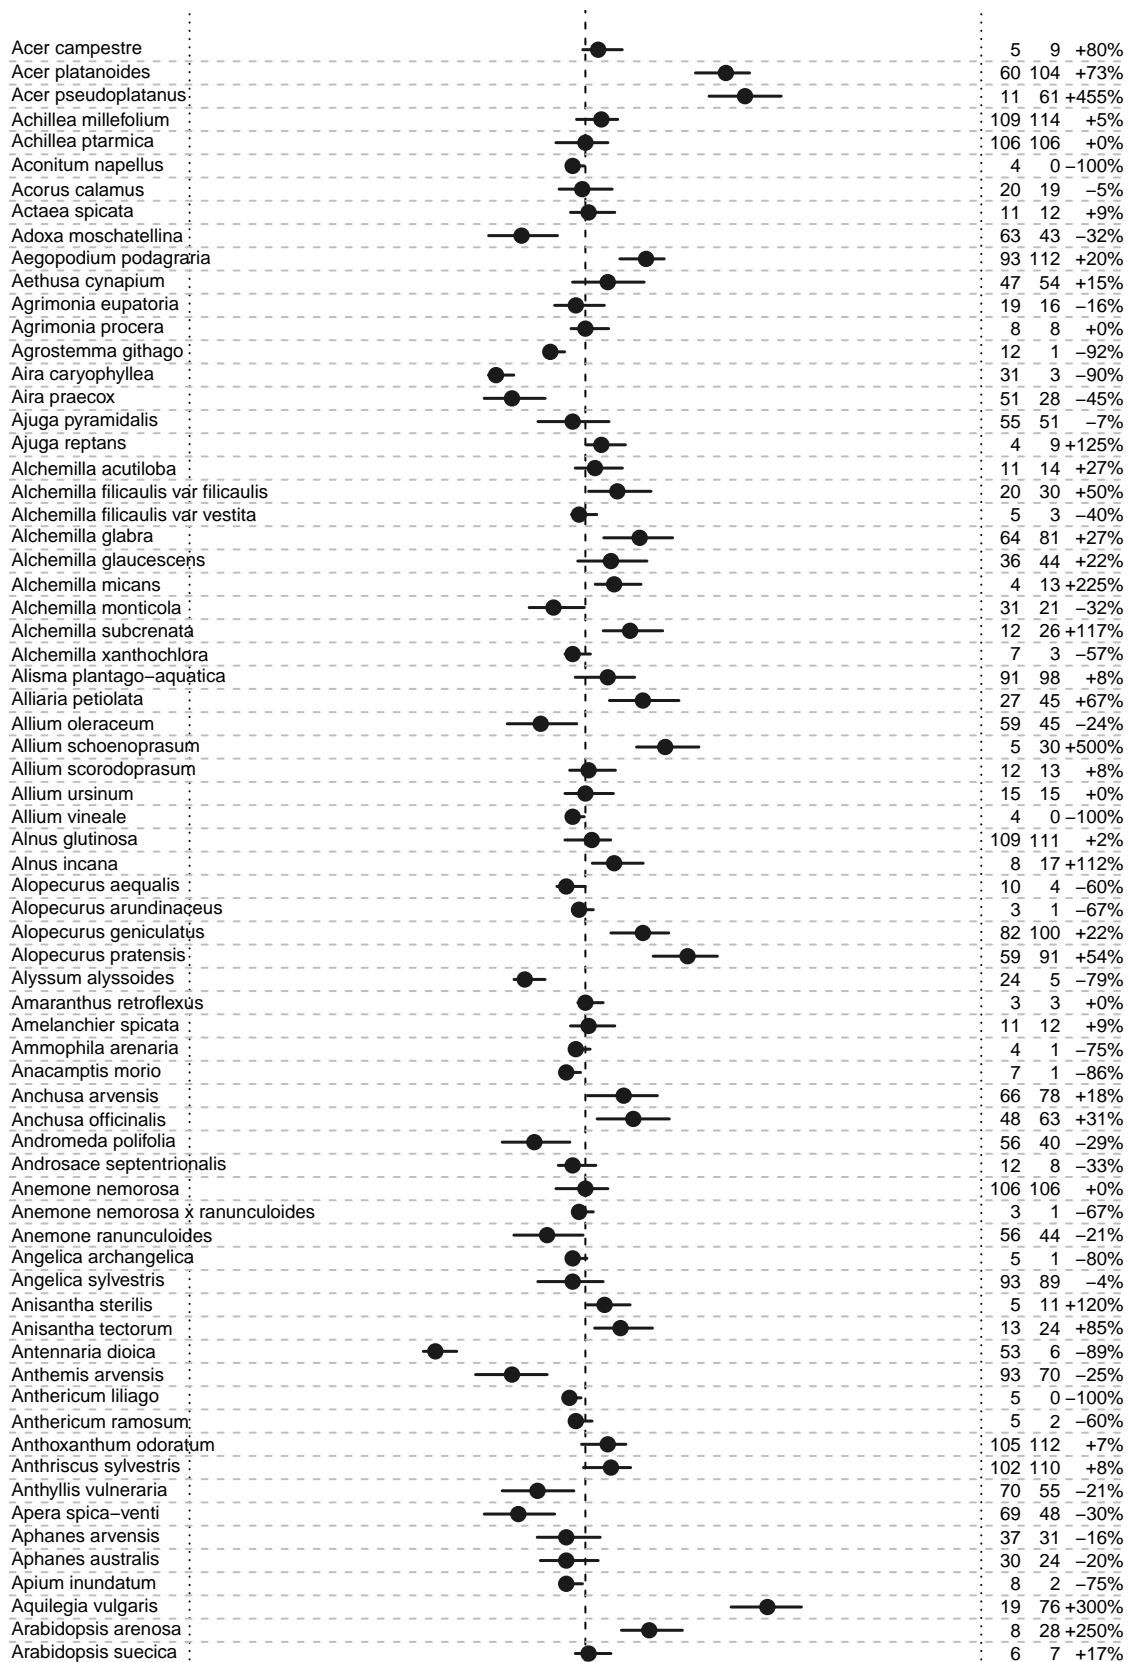

-1.0                      -0.5                      0.0                      0.5                      1.0

Rates

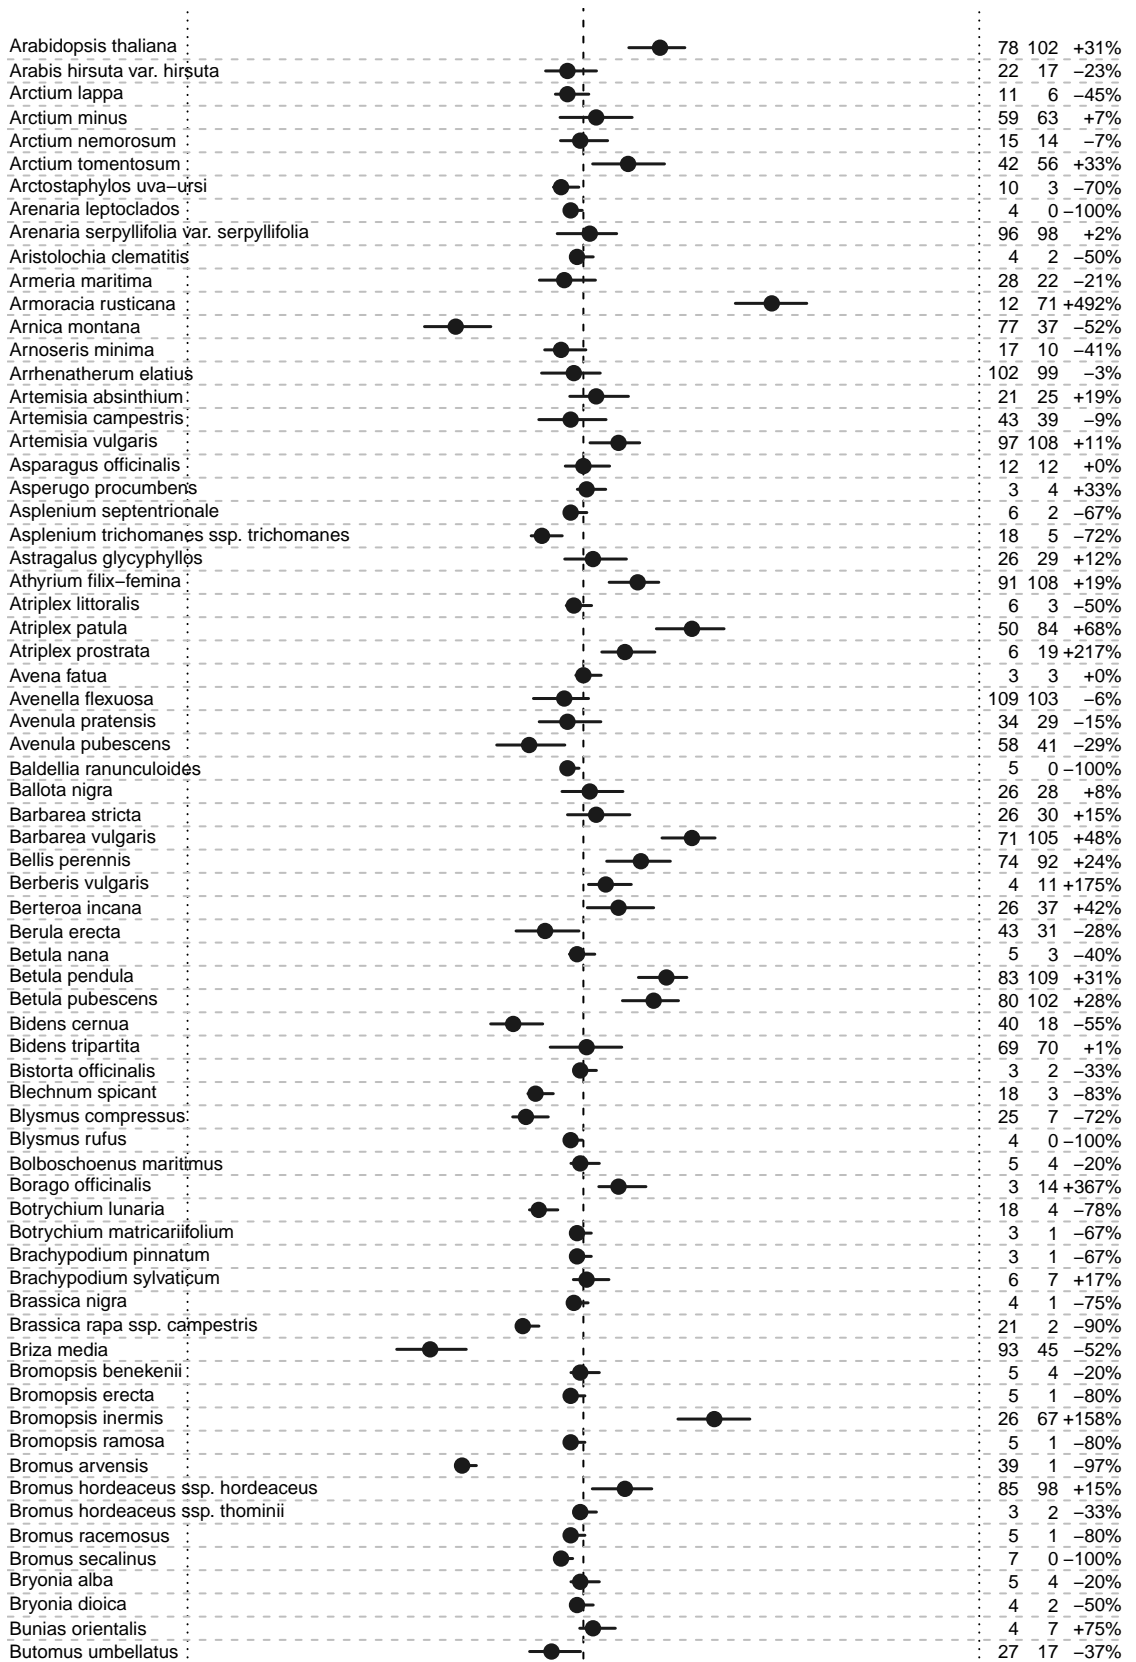

Rates

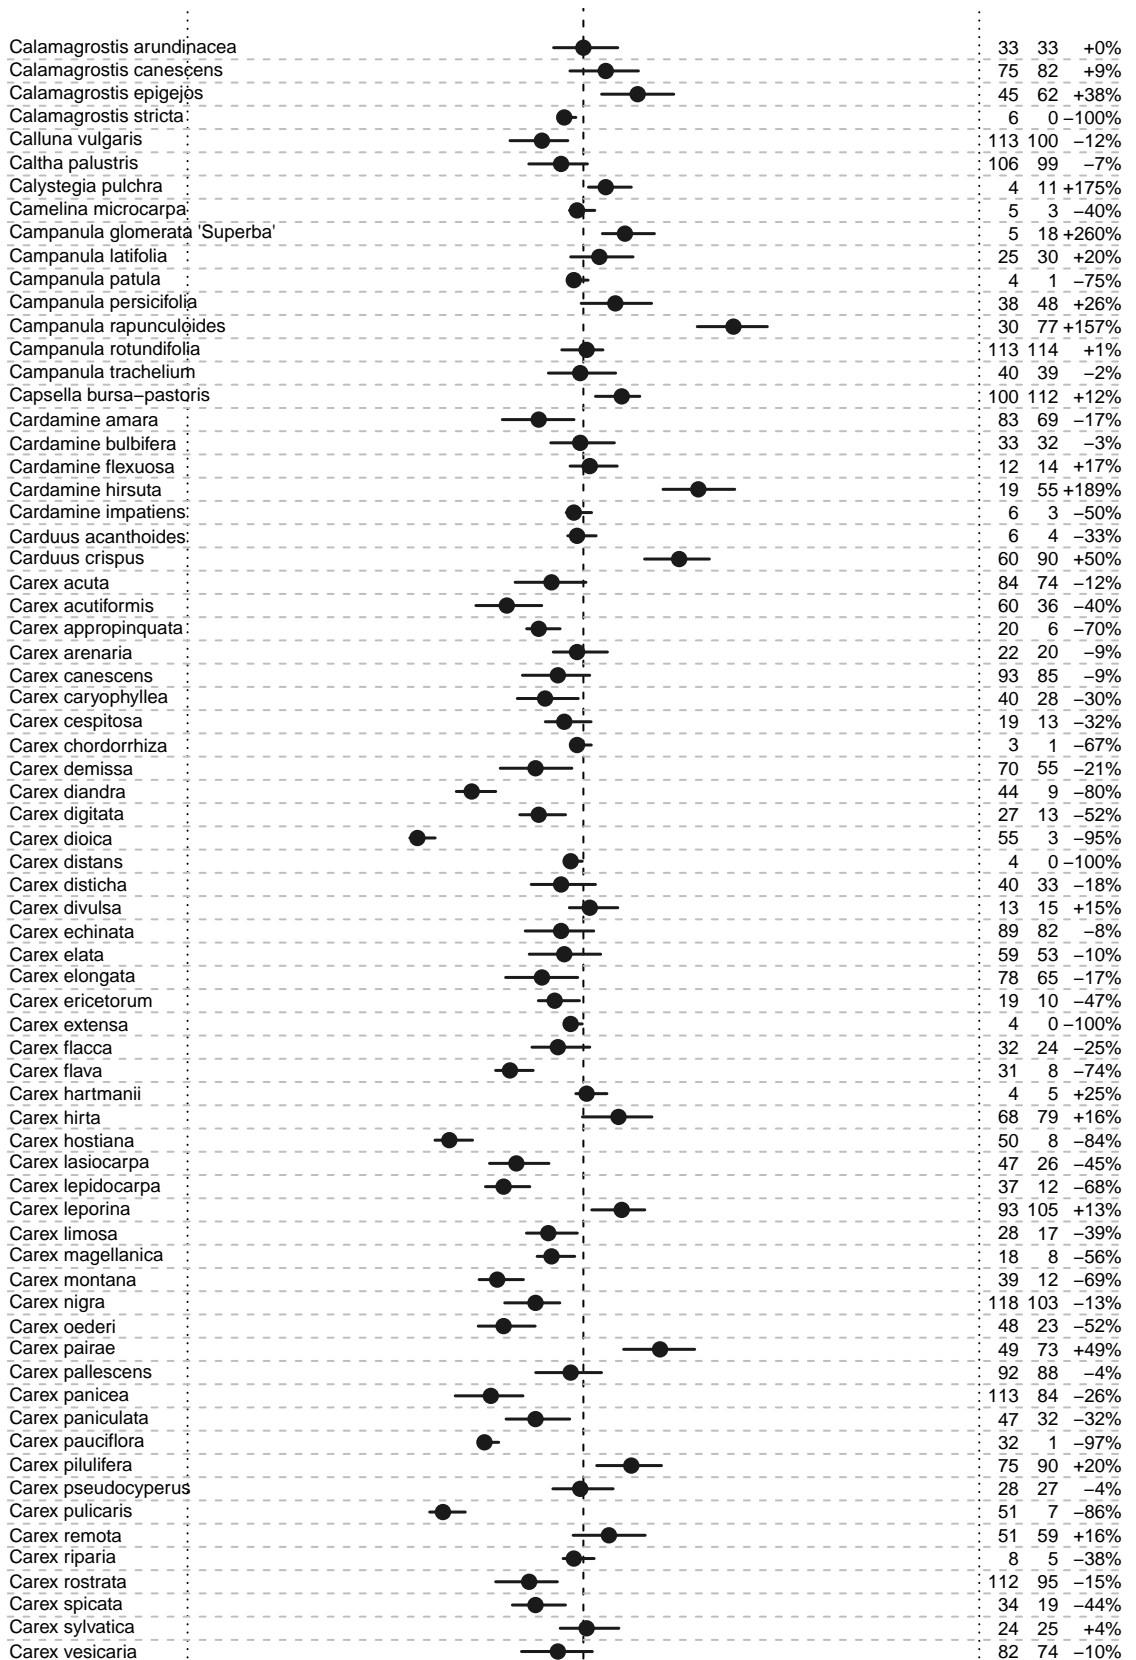

-1.0                      -0.5                      0.0                      0.5                      1.0

Rates

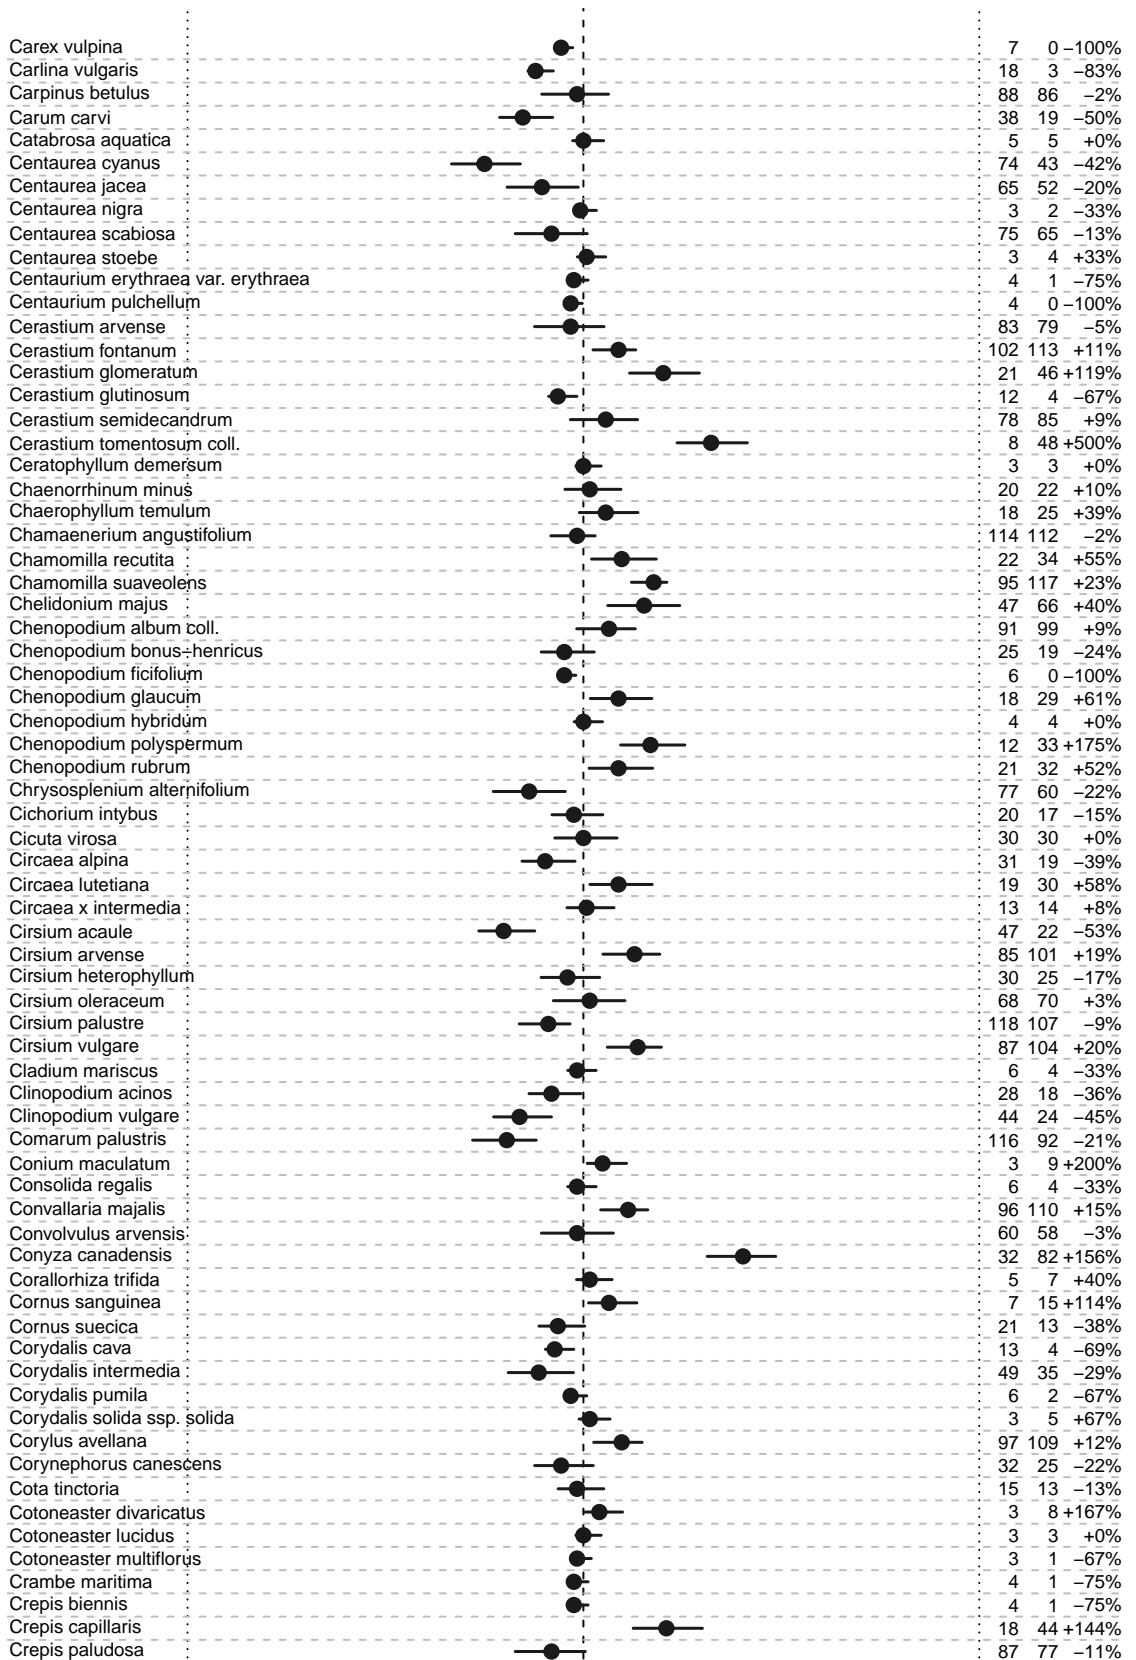

-1.0                      -0.5                      0.0                      0.5                      1.0

Rates

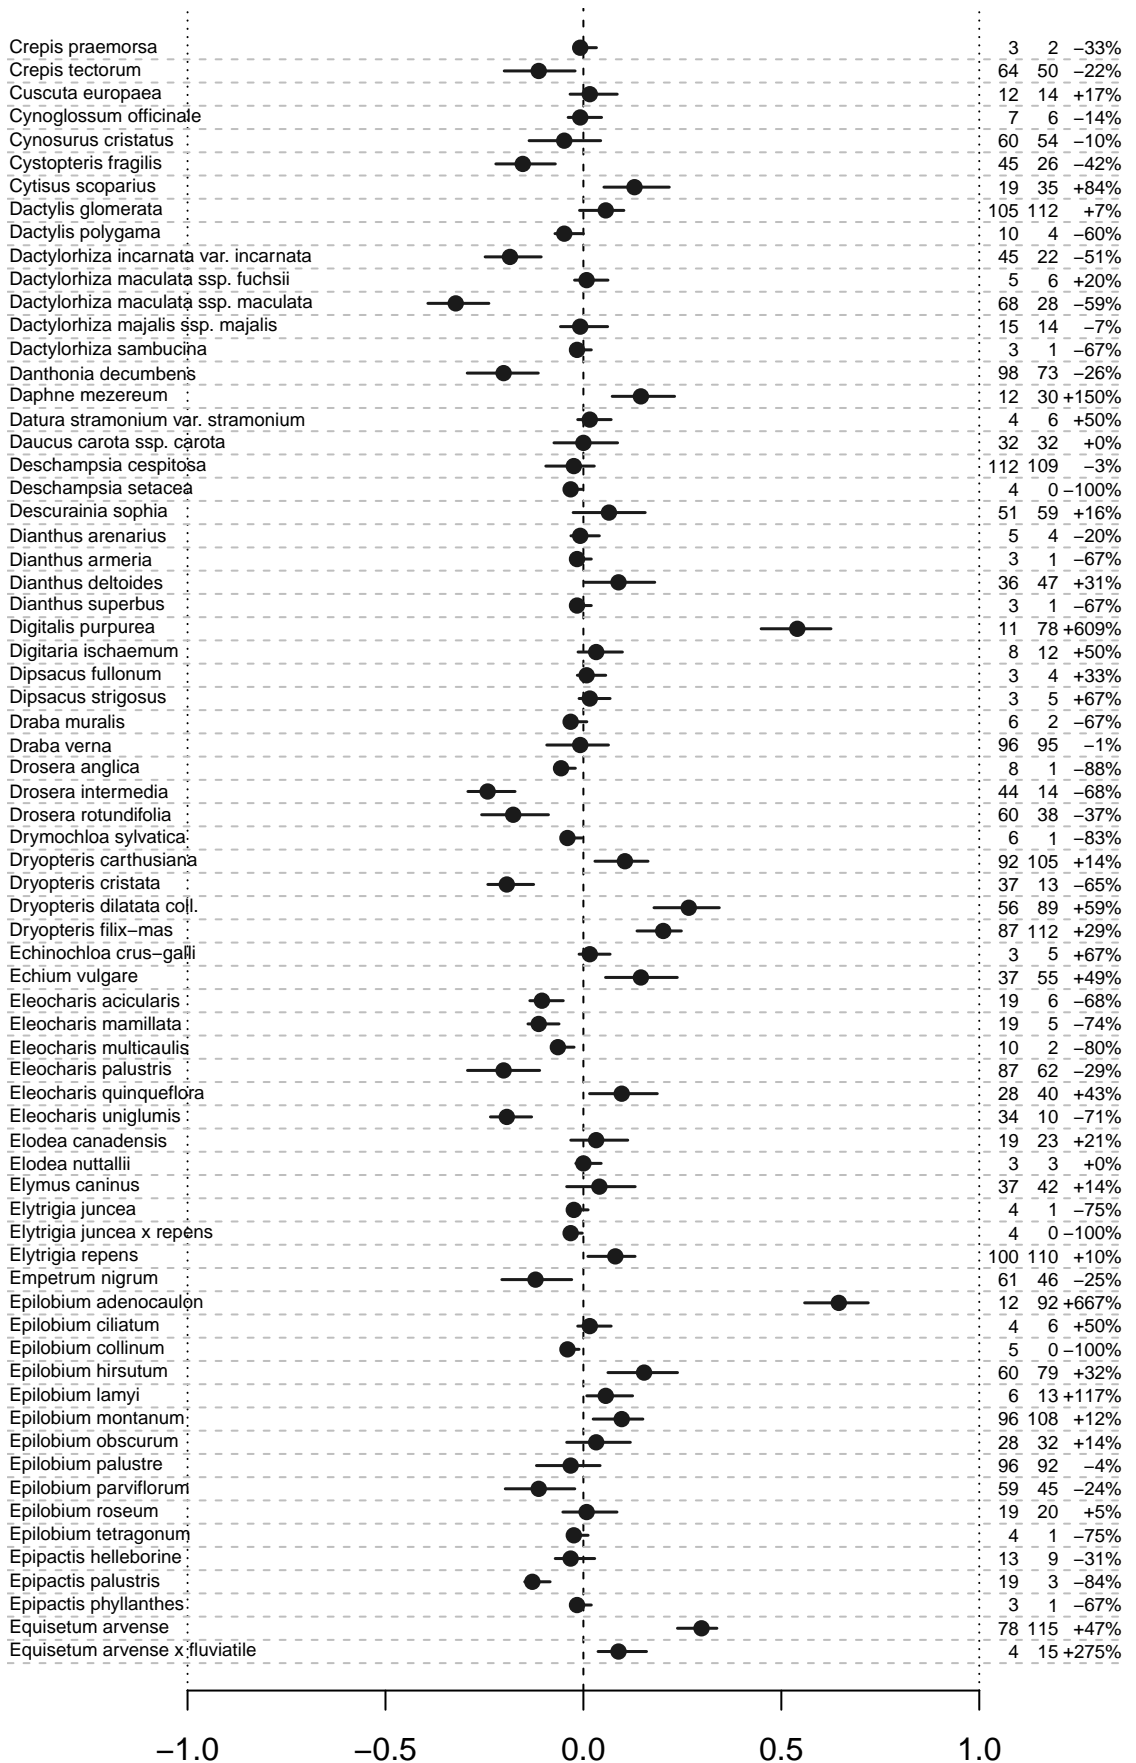

Rates

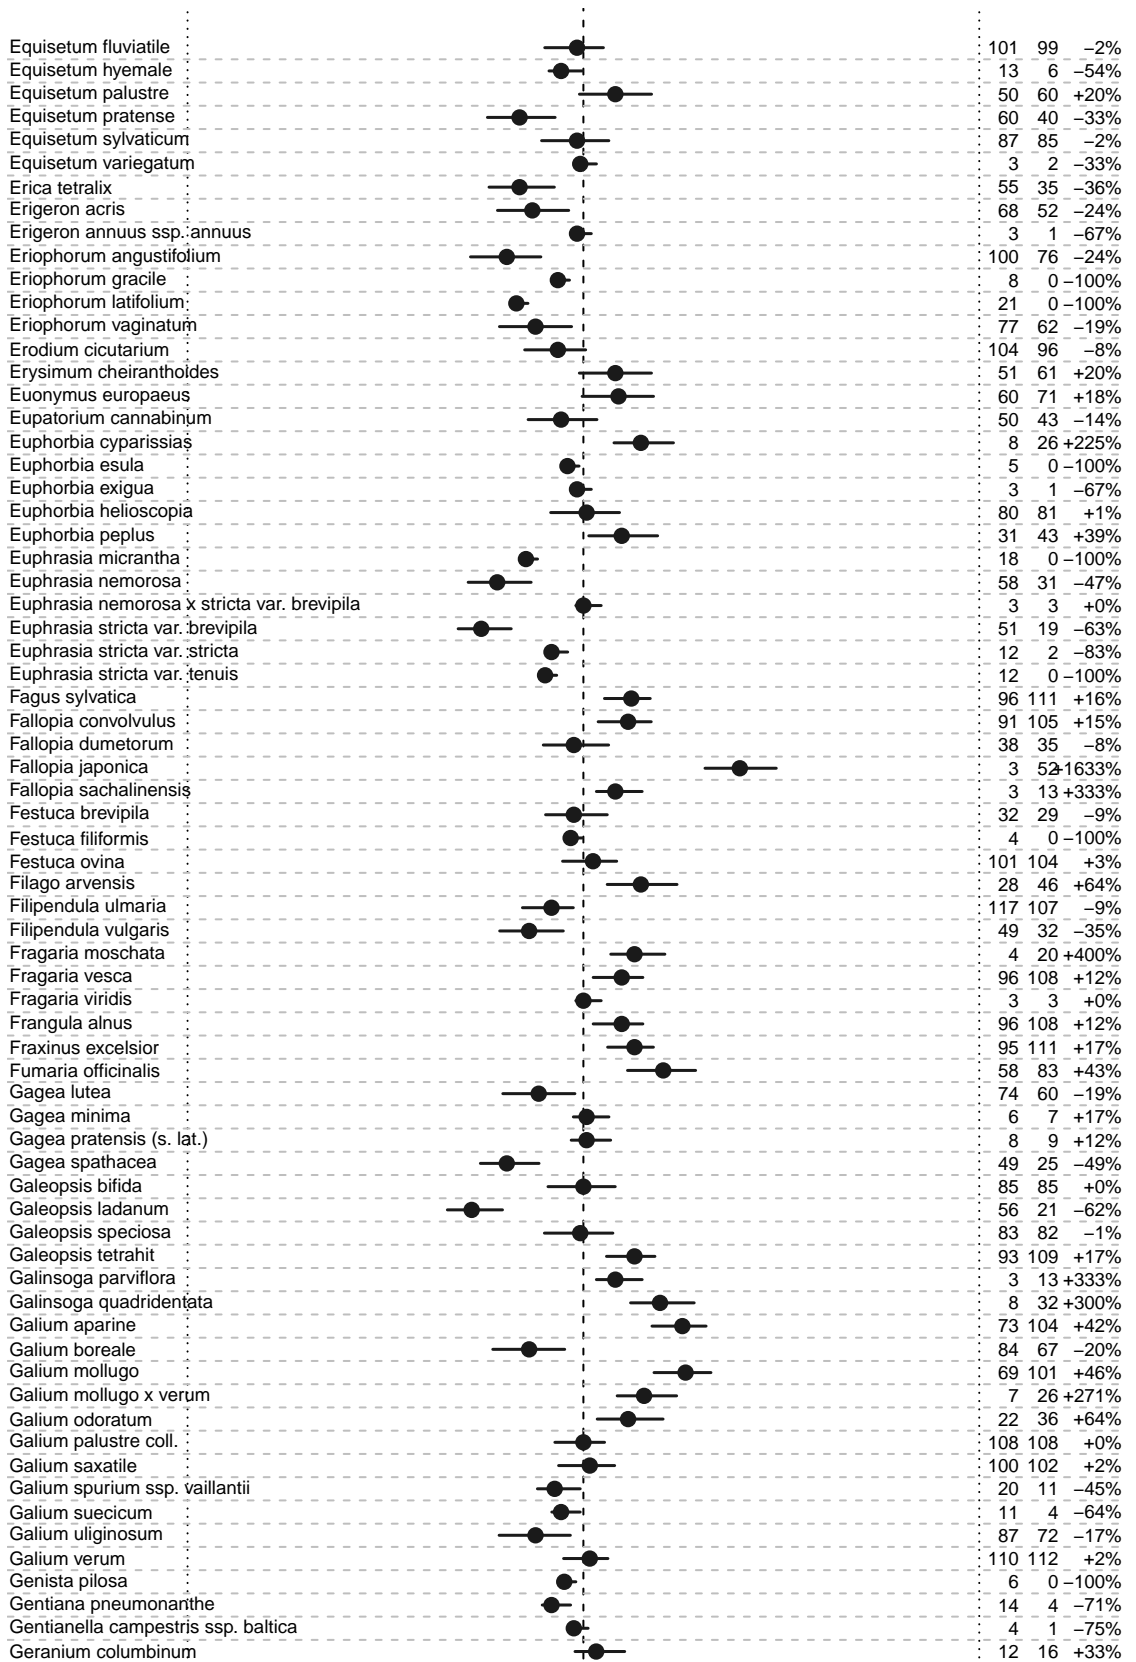

Rates

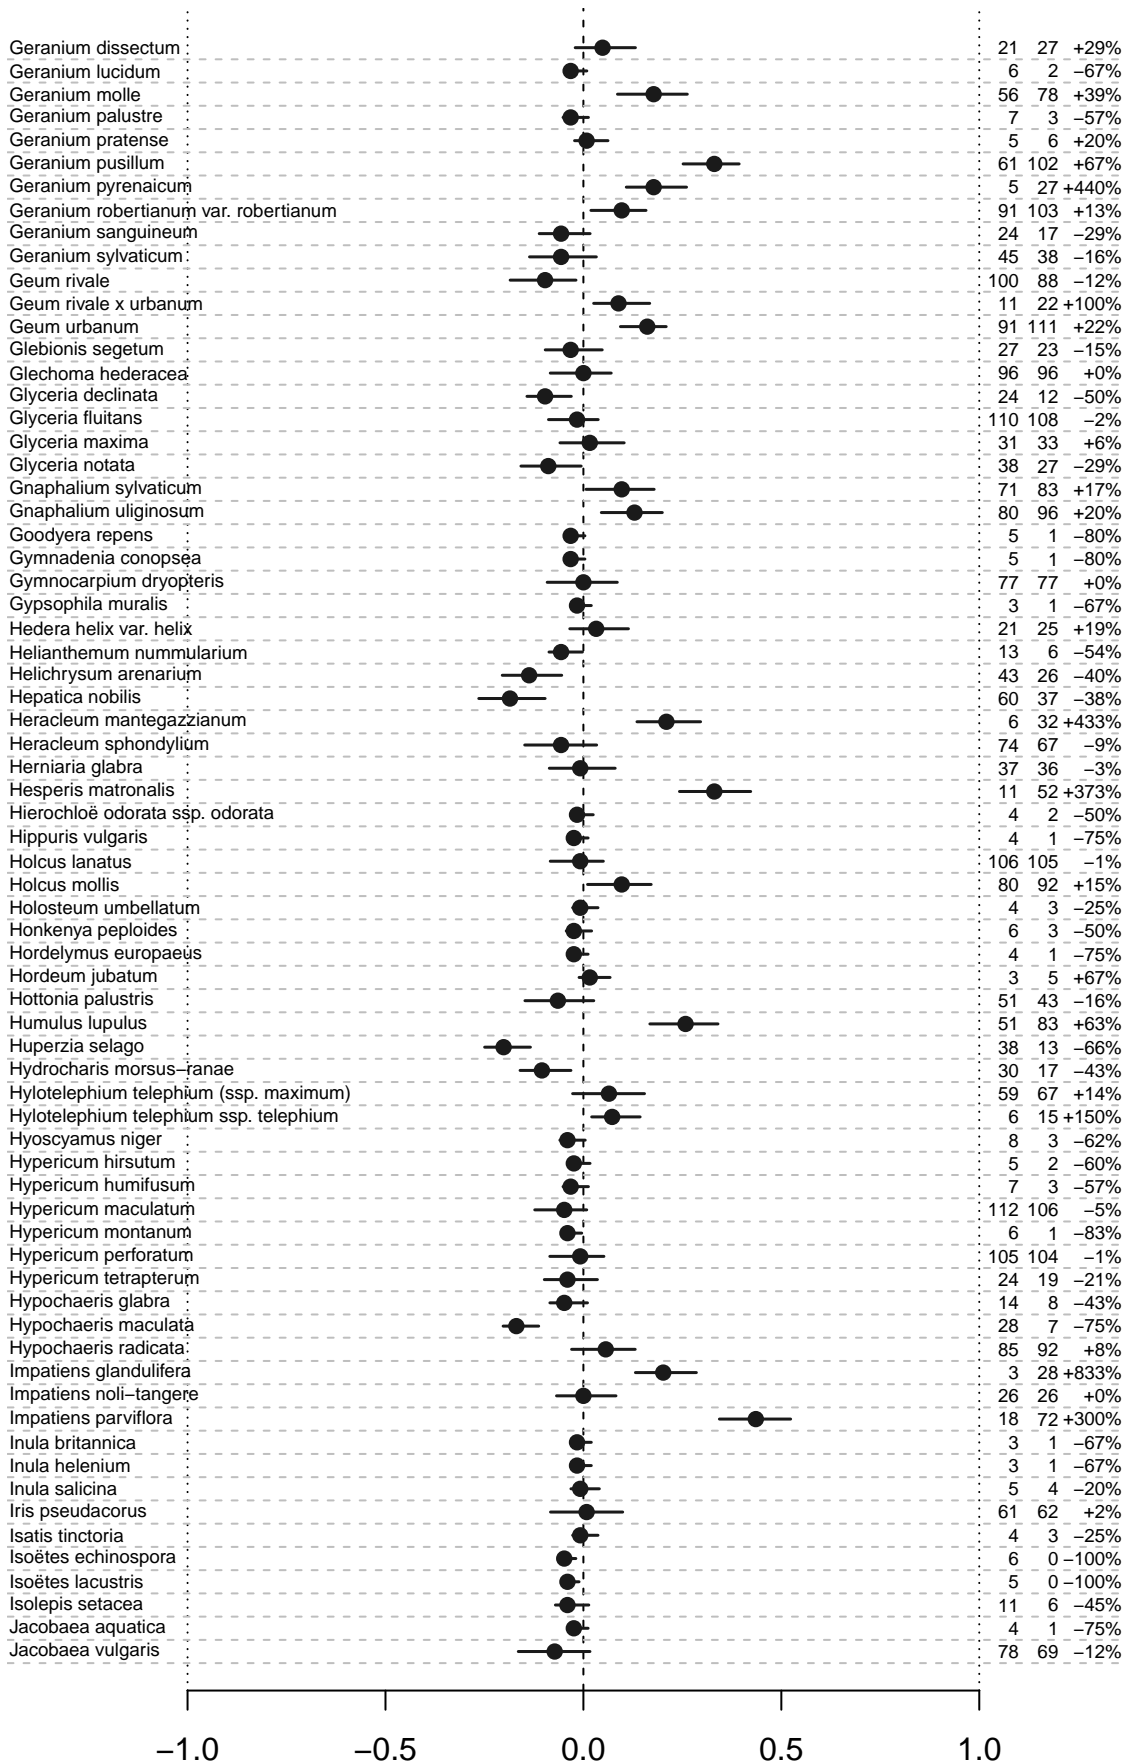

Rates

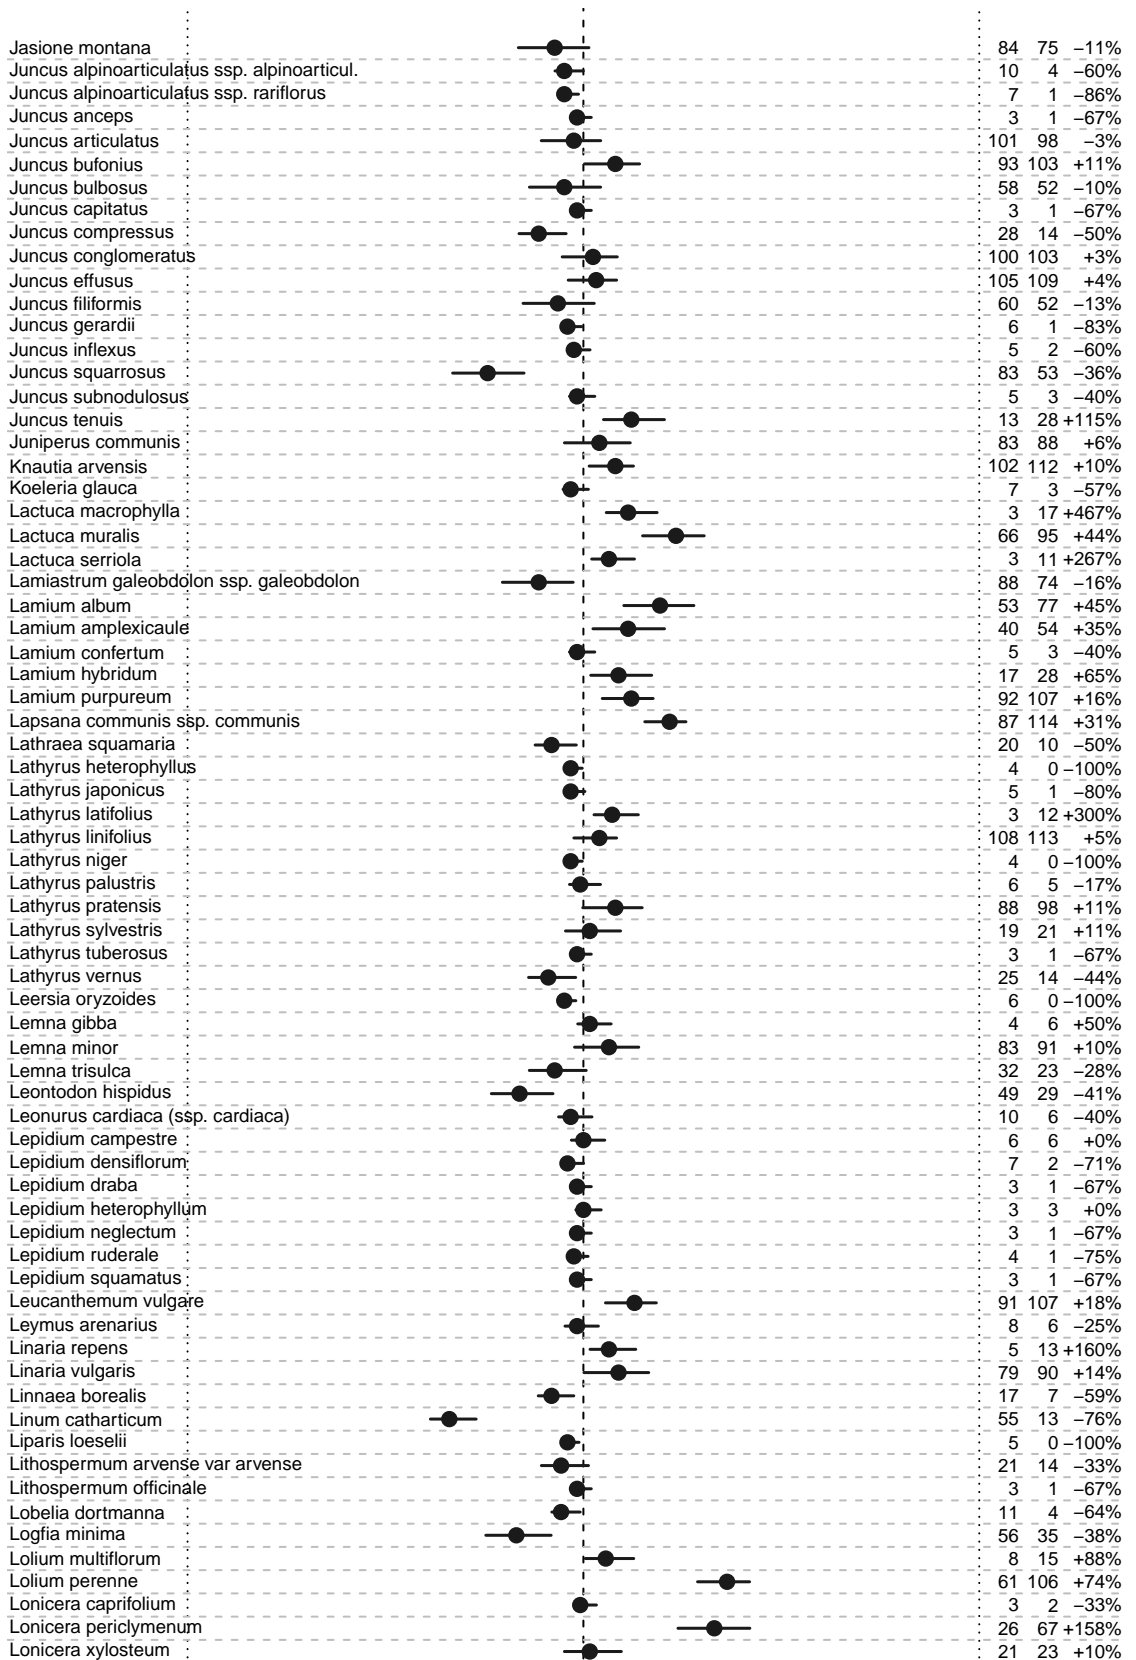

Rates



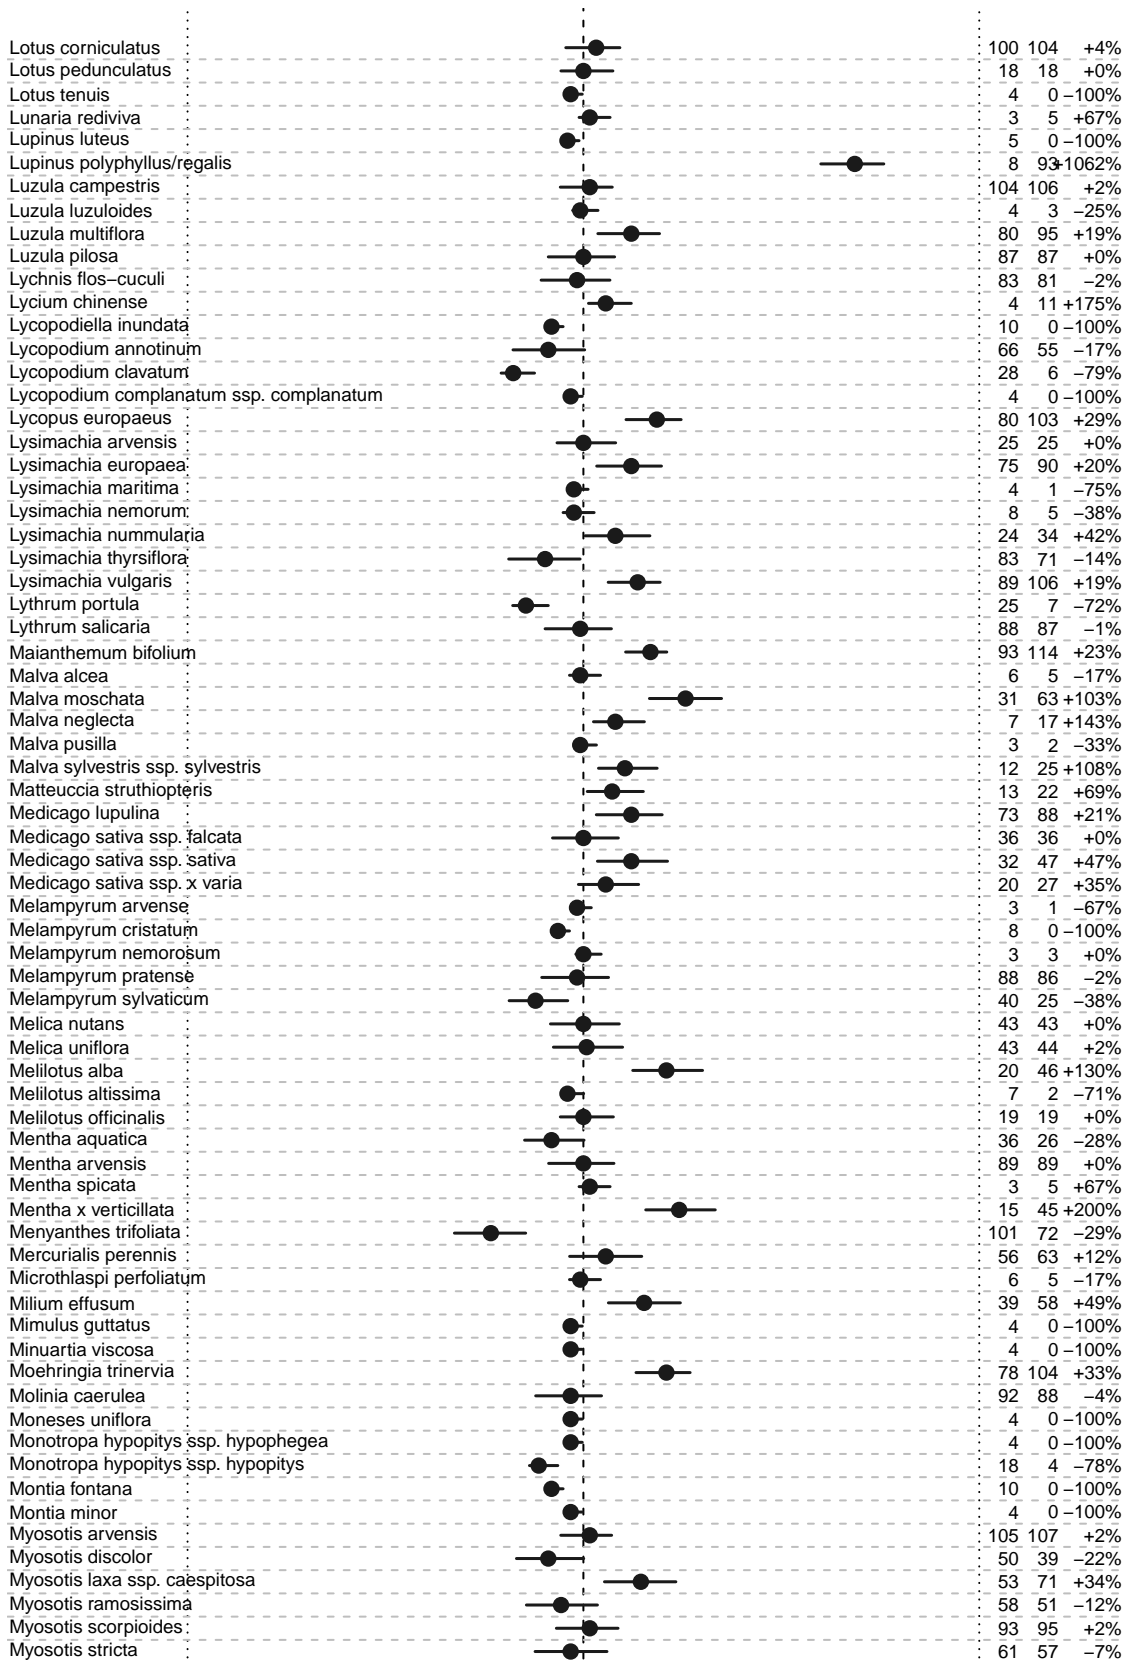

Rates

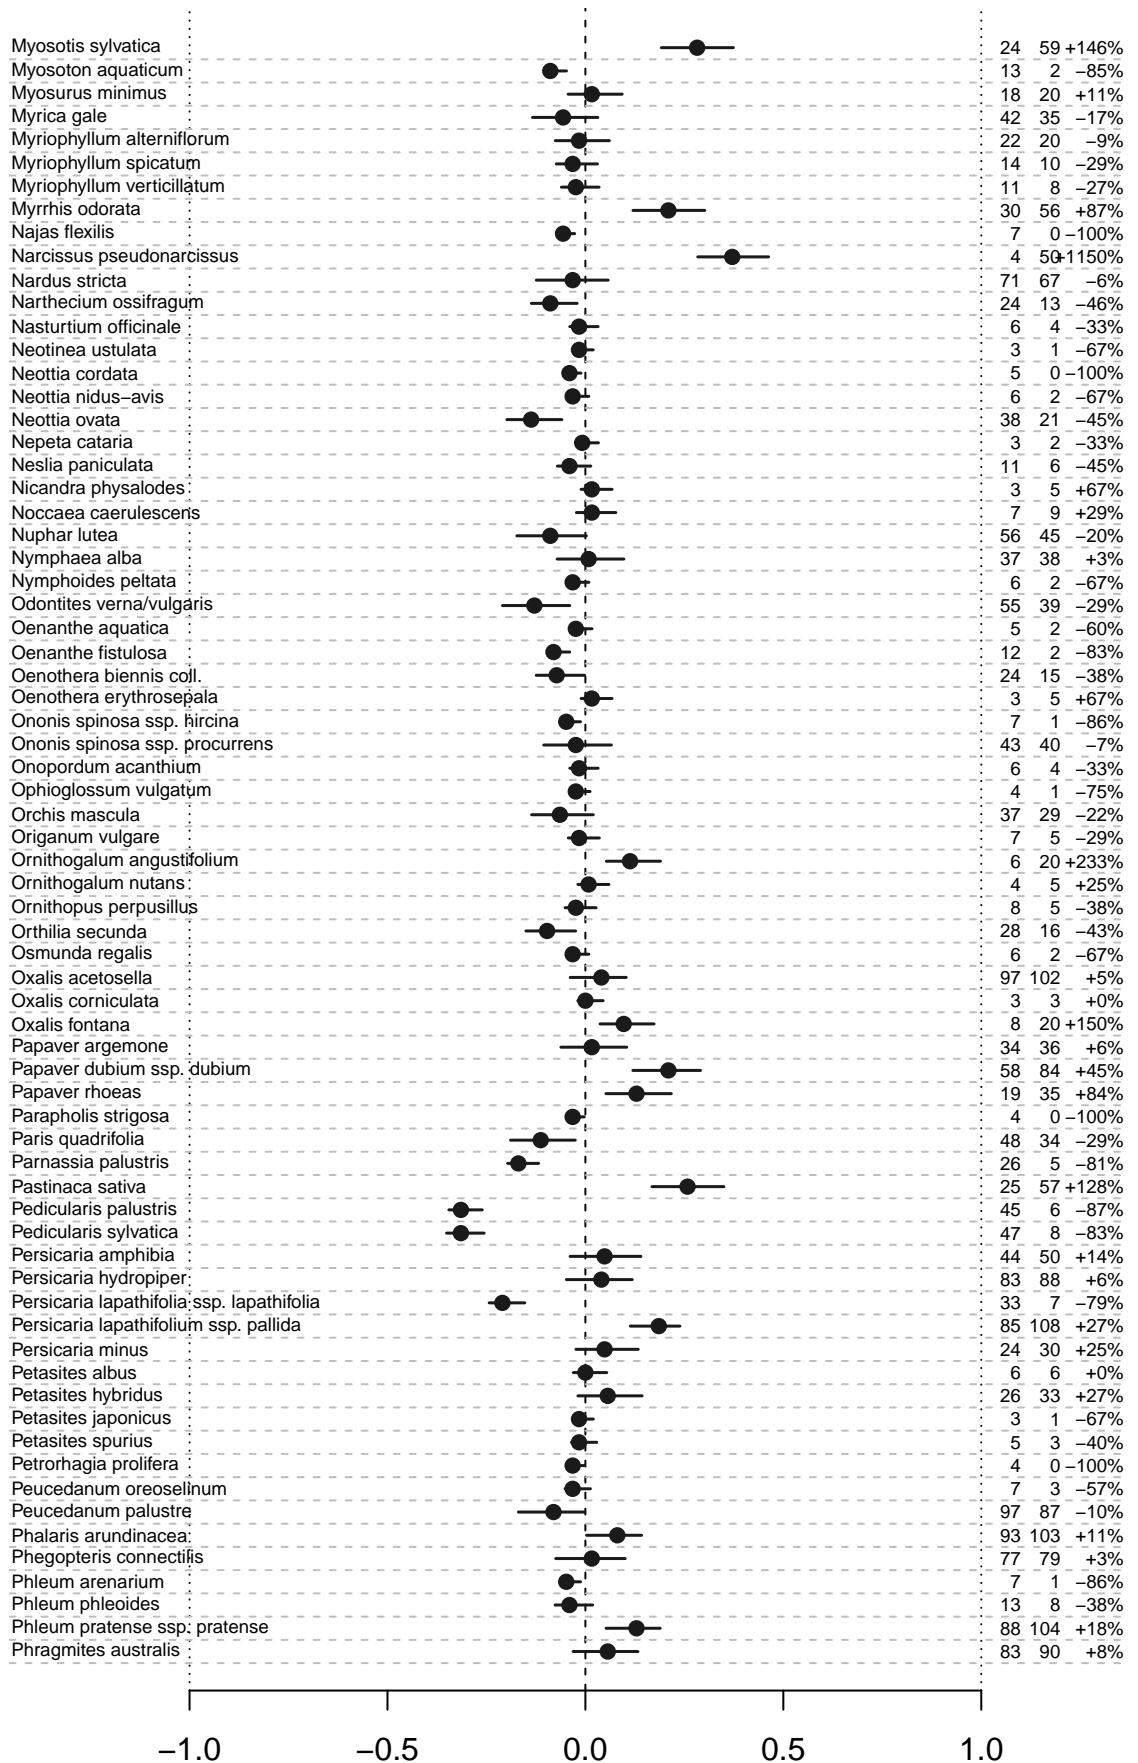

Rates

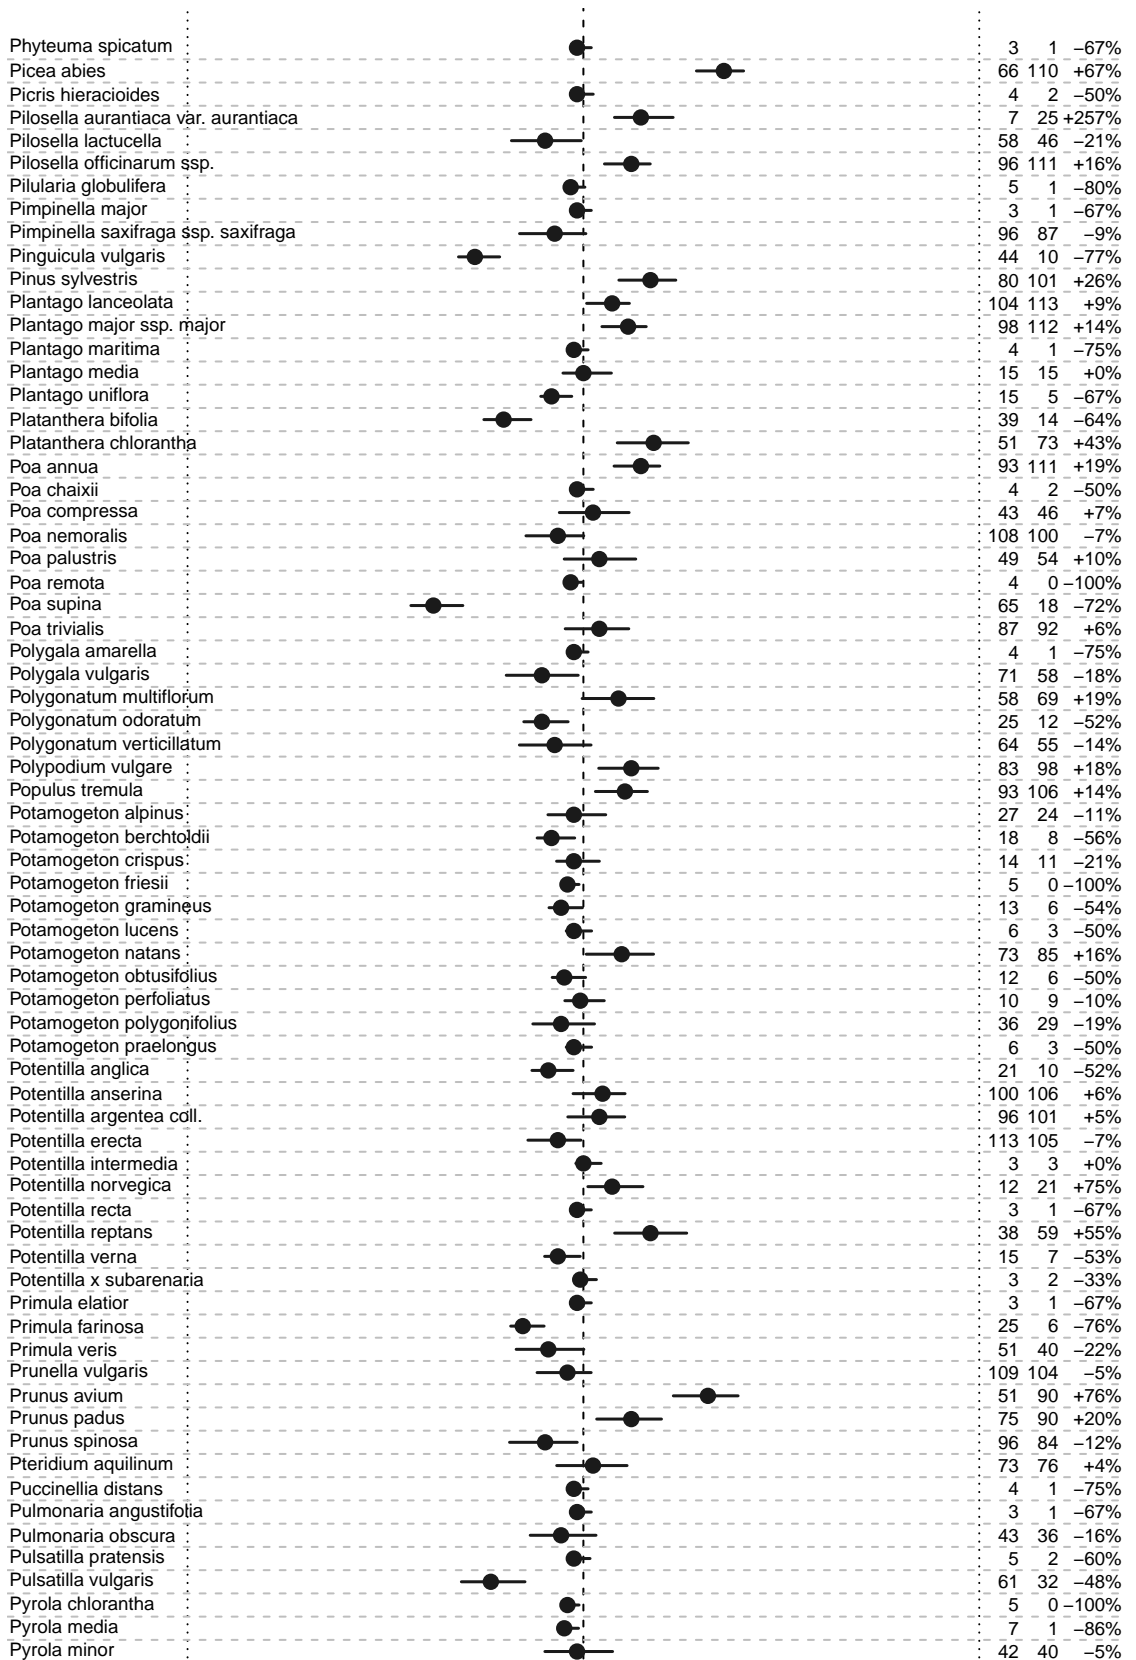

Rates

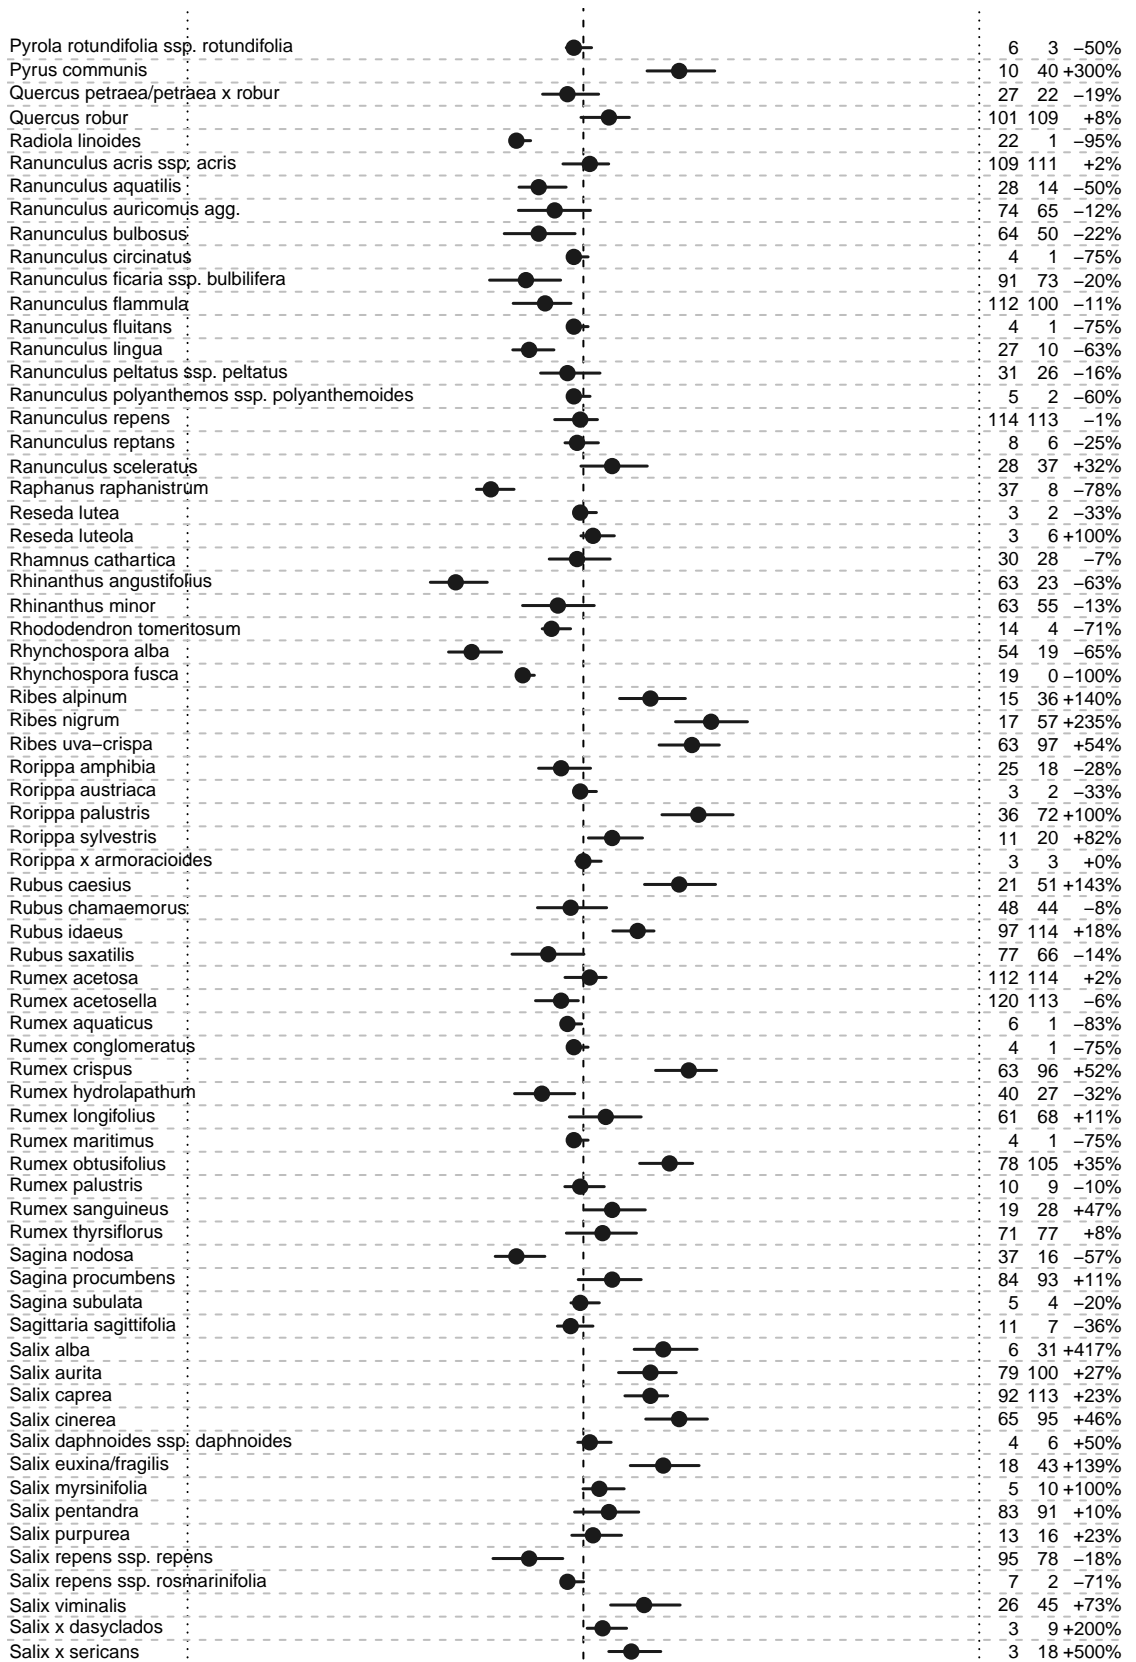

-1.0                      -0.5                      0.0                      0.5                      1.0

Rates

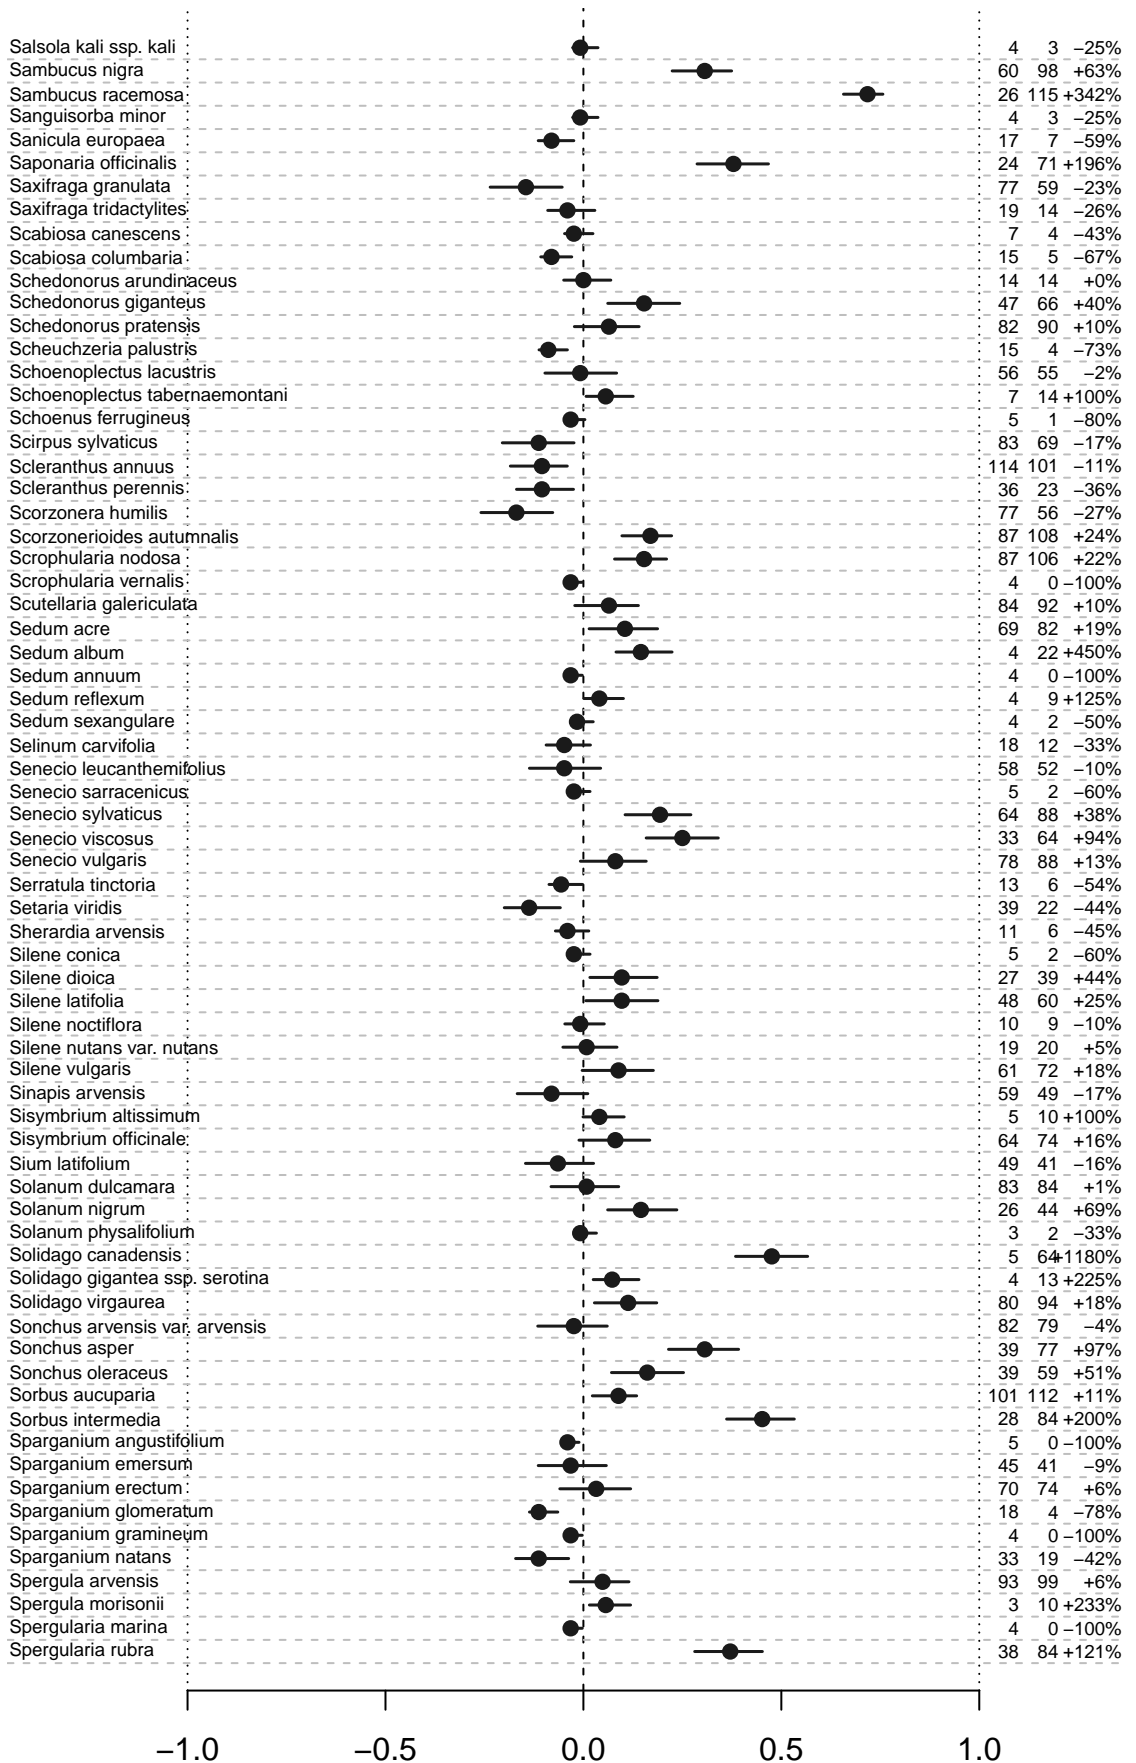

Rates

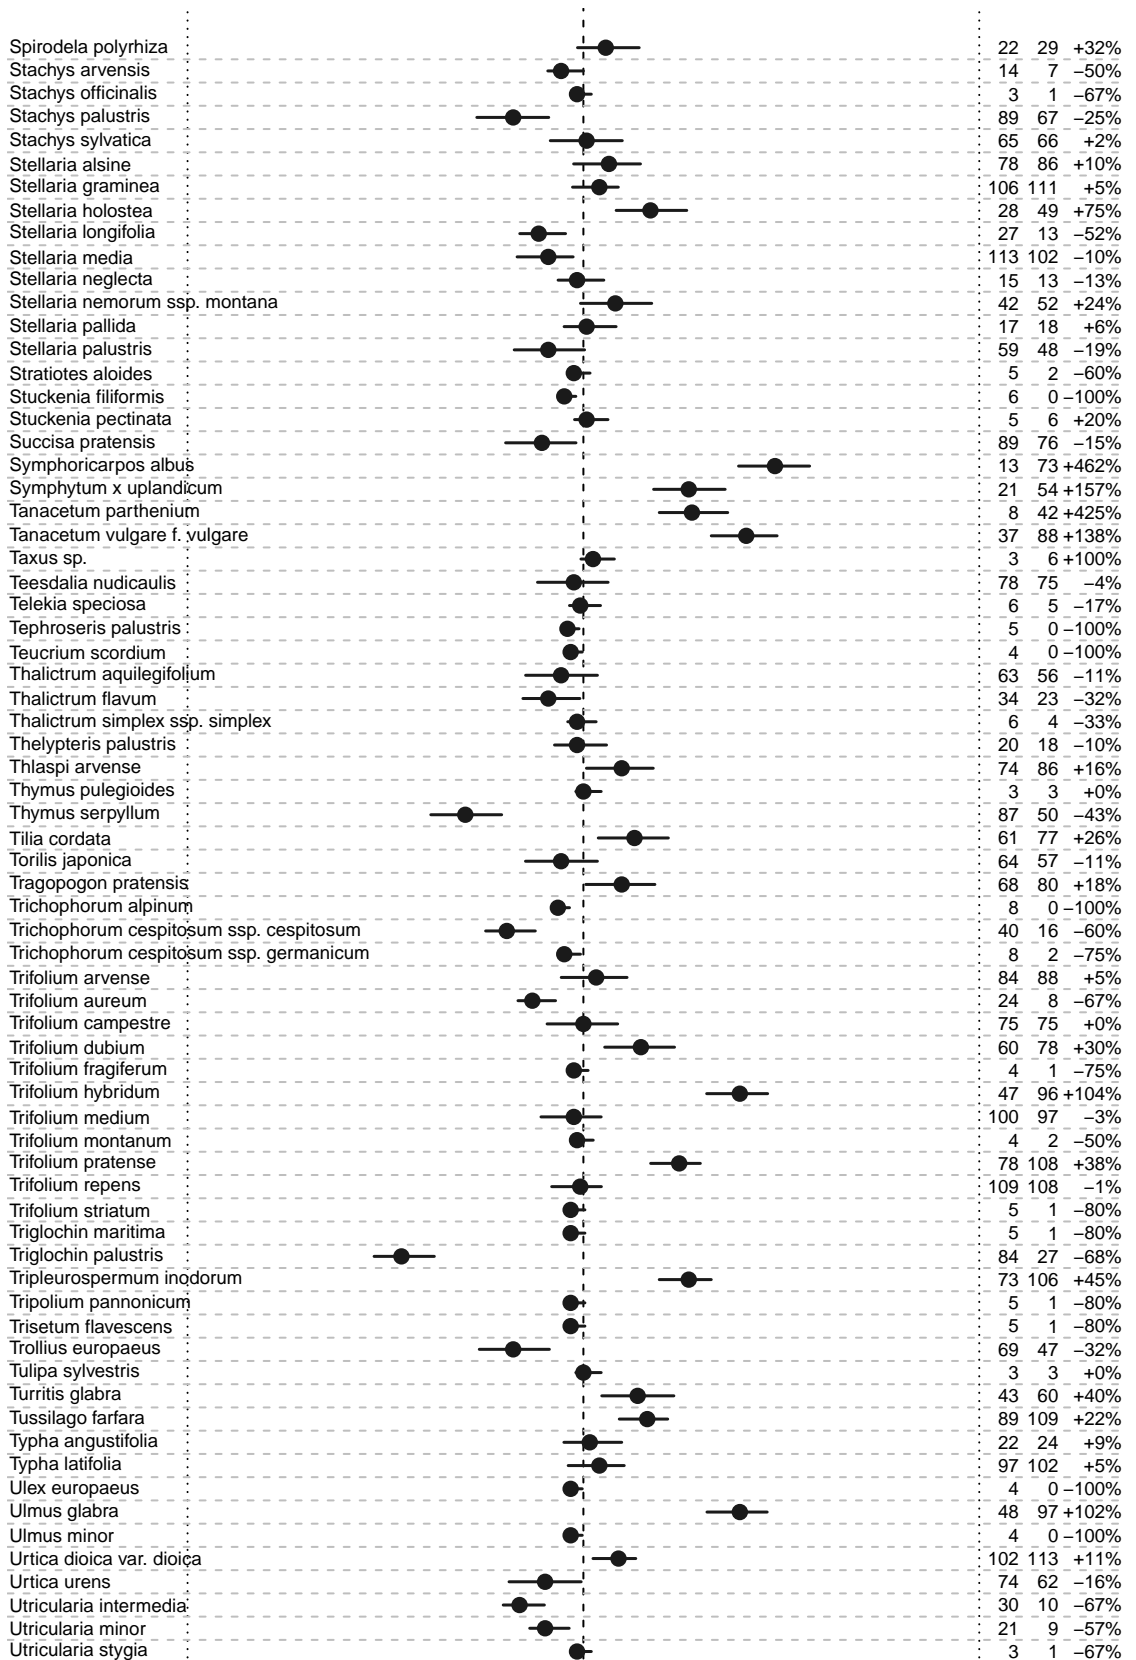

-1.0                      -0.5                      0.0                      0.5                      1.0

Rates

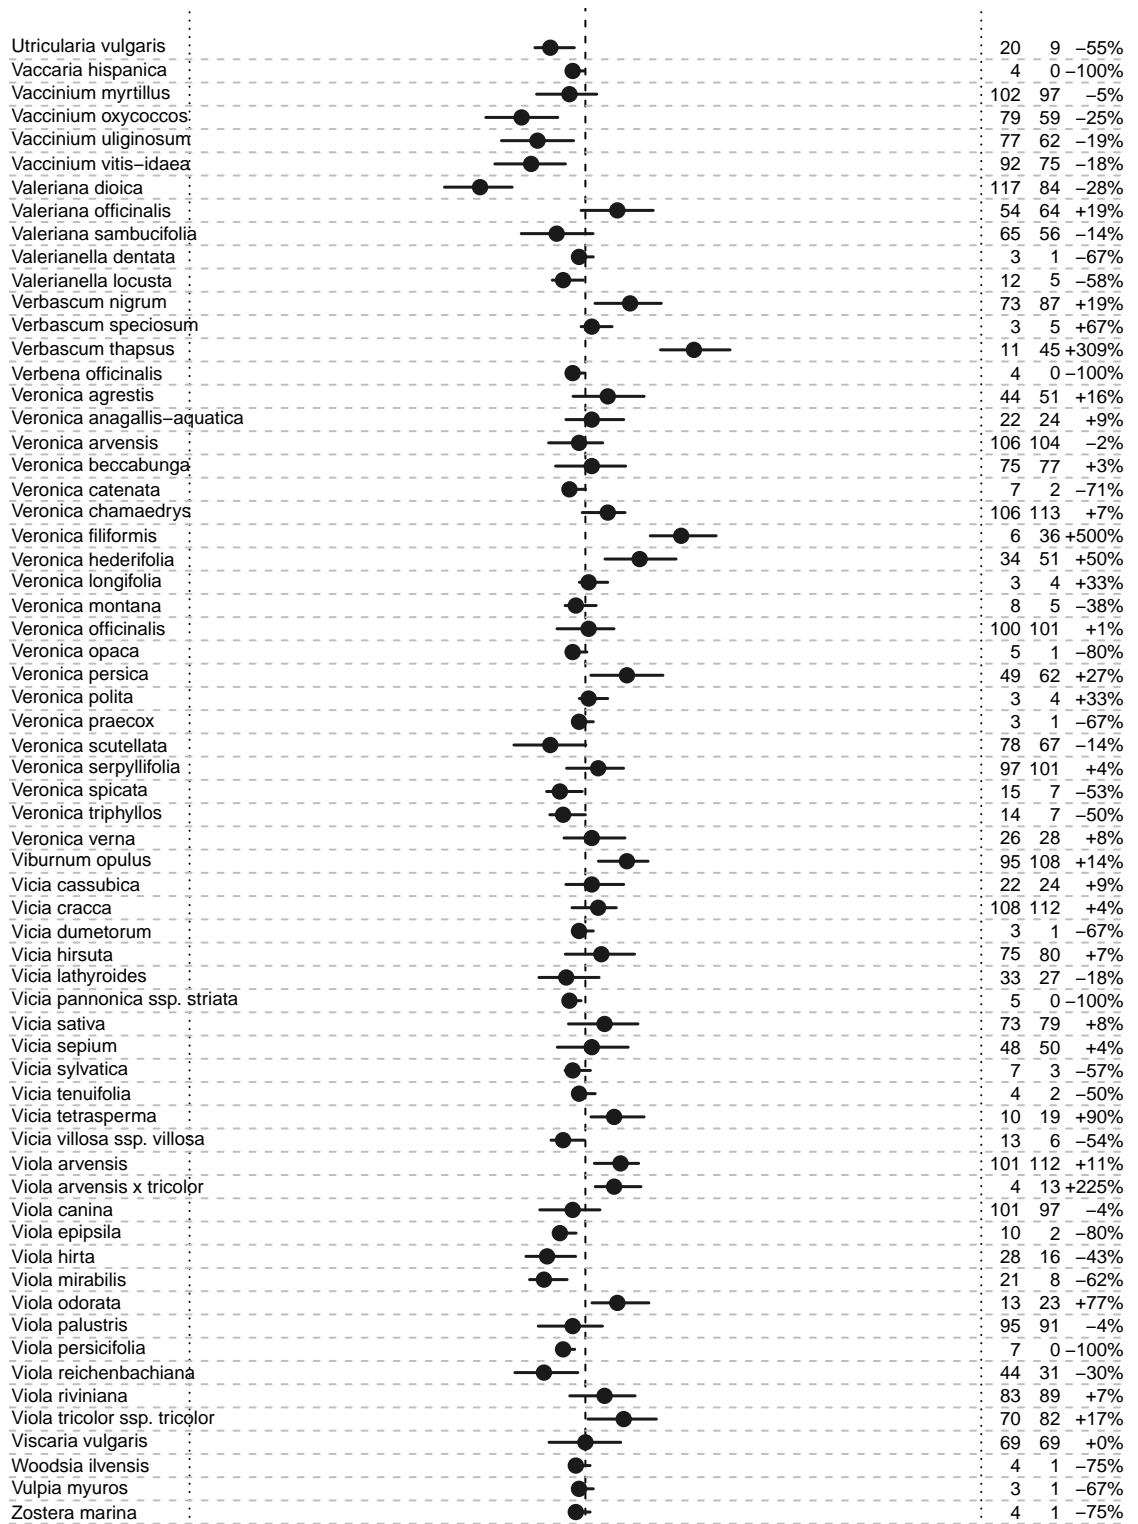

-1.0                      -0.5                      0.0                      0.5                      1.0

Rates

Supplement: MOESM2 [file 17436674]
